# Supplementary material for: Selective mono- and dimetallation of a group 3 sandwich complex
Source: Royal Society of Chemistry journal article supplement (doi:10.1039/c9cc03825f), 2019-01-01
Supplement: c9cc03825f1.pdf [file c9cc03825f1.pdf]

## Supporting Information

*for*

### Selective Mono- and Dimetallation of a Group 3 Sandwich Complex

**Antonio J. Martínez-Martínez,<sup>a</sup> Alan R. Kennedy,<sup>b</sup> Valerie Paprocki,<sup>c</sup> Felipe Fantuzzi,<sup>c</sup> Rian D. Dewhurst,<sup>c</sup> Charles T. O'Hara,<sup>b</sup> Holger Braunschweig<sup>c,\*</sup> and Robert E. Mulvey<sup>b,\*</sup>**

[a] *Department of Chemistry, Chemistry Research Laboratories, Mansfield Road, University of Oxford, Oxford, UK*

[b] *WestCHEM, Department of Pure and Applied Chemistry, University of Strathclyde, Glasgow, G1 1XL, United Kingdom*

[c] *Institute for Inorganic Chemistry, Julius-Maximilians-Universität Würzburg, Am Hubland, 97074 Würzburg, Germany*

## Table of Contents

|          |                                                                                                                                                                                           |           |
|----------|-------------------------------------------------------------------------------------------------------------------------------------------------------------------------------------------|-----------|
| <b>1</b> | <b>General procedures</b> .....                                                                                                                                                           | <b>3</b>  |
| <b>2</b> | <b>Synthetic protocols</b> .....                                                                                                                                                          | <b>4</b>  |
| 2.1      | Control reaction of <b>1</b> with LiTMP to give $\text{Li}\{(\eta^5\text{-C}_5\text{H}_4)\text{Sc}(\eta^8\text{-C}_8\text{H}_8)\}$ ( <b>2</b> )                                           | 4         |
| 2.2      | Synthesis of $[\text{THF}\cdot\text{Li}(\mu\text{-TMP})\{\mu\text{-}\{(\eta^5\text{-C}_5\text{H}_4)\text{Sc}(\eta^8\text{-C}_8\text{H}_8)\}\}\text{Al}(i\text{Bu})_2]$ ( <b>3</b> )       | 4         |
| 2.3      | Synthesis of $[\{\text{THF}\cdot\text{Li}(\mu\text{-TMP})\text{Al}(i\text{Bu})_2\}_2\{\mu\text{-}\{(\eta^5\text{-C}_5\text{H}_4)\text{Sc}(\eta^8\text{-C}_8\text{H}_7)\}\}]$ ( <b>4</b> ) | 5         |
| 2.4      | Quenching Reaction of <b>3</b> with $\text{I}_2$                                                                                                                                          | 6         |
| <b>3</b> | <b>NMR Spectra</b> .....                                                                                                                                                                  | <b>7</b>  |
| <b>4</b> | <b><math>^1\text{H}</math> DOSY NMR Analyses</b> .....                                                                                                                                    | <b>19</b> |
| 4.1      | General Considerations                                                                                                                                                                    | 19        |
| 4.2      | DOSY NMR Sample Preparation                                                                                                                                                               | 19        |
| 4.3      | $^1\text{H}$ DOSY NMR Study of Compound <b>3</b> in $[\text{D}_8]\text{THF}$                                                                                                              | 20        |
| 4.4      | $^1\text{H}$ DOSY NMR Study of Compound <b>4</b> in $[\text{D}_8]\text{THF}$                                                                                                              | 22        |
| <b>5</b> | <b>X-ray Crystallography</b> .....                                                                                                                                                        | <b>24</b> |
| <b>6</b> | <b>Computational Details</b> .....                                                                                                                                                        | <b>26</b> |
| 6.1      | Cartesian Coordinates (B3LYP/6-31+G*)                                                                                                                                                     | 26        |
| 6.2      | Hessian Calculations (B3LYP/6-31+G*)                                                                                                                                                      | 32        |
| 6.3      | Thermochemical Analysis                                                                                                                                                                   | 33        |
| 6.4      | Frontier Molecular Orbitals (B3LYP/6-311++G**//B3LYP/6-31+G*)                                                                                                                             | 34        |
| <b>7</b> | <b>References</b> .....                                                                                                                                                                   | <b>36</b> |

## 1 General procedures

All reactions were performed under a protective atmosphere of dry pure argon gas using standard Schlenk techniques. Products **3** and **4** were isolated inside an argon-filled dry box. *n*-hexane, methylcyclohexane and tetrahydrofuran (THF) were dried by heating to reflux over sodium benzophenone ketyl and distilled under nitrogen prior to use. C<sub>6</sub>D<sub>6</sub> was degassed and stored over 4 Å molecular sieves prior to use. [D<sub>8</sub>]THF was degassed and stored over a potassium mirror prior to use. 2,2,6,6-Tetramethylpiperidine TMP(H) was purchased from Merck KGaA and used as received. *n*BuLi (1.6M in *n*-hexane solution, titrated prior to use), *i*Bu<sub>2</sub>AlCl, I<sub>2</sub>, 18-crown-6 and TMEDA were purchased from Aldrich and used as received. TMSCl was purchased from Aldrich and, after distillation, stored over 4 Å molecular sieves. LiTMP<sup>1</sup> and *i*Bu<sub>2</sub>Al(TMP)<sup>2</sup> were prepared according to literature procedures. NMR spectra were recorded on a Bruker AVANCE 400 NMR spectrometer operating at 400.1, 155.5 and 100.6 MHz for <sup>1</sup>H, <sup>7</sup>Li, and <sup>13</sup>C, respectively. <sup>1</sup>H and <sup>13</sup>C{<sup>1</sup>H} chemical shifts are expressed in parts per million ( $\delta$ , ppm) and were referenced to the appropriate residual solvent signal, while <sup>7</sup>Li NMR spectra were referenced against an external sample of LiCl (0.00 ppm in D<sub>2</sub>O). The NMR spectroscopic assignments were performed, in some cases, with the help of <sup>13</sup>C{<sup>1</sup>H}-DEPT135, <sup>1</sup>H,<sup>1</sup>H-COSY, <sup>1</sup>H,<sup>13</sup>C-HMQC and <sup>1</sup>H,<sup>13</sup>C-HMBC experiments. All coupling constants (*J*) are absolute values (Hz) and descriptions of signals are: s (singlet), d (doublet), t (triplet), q (quartet), sept (septuplet) and m (multiplet). Satisfactory elemental analyses of the air-sensitive products **3** and **4** were obtained using a Perkin–Elmer 2400 elemental analyser.

## 2 Synthetic protocols

### 2.1 Control reaction of **1** with LiTMP to give $\text{Li}\{(\eta^5\text{-C}_5\text{H}_4)\text{Sc}(\eta^8\text{-C}_8\text{H}_8)\}$ (**2**)

$[(\eta^5\text{-C}_5\text{H}_5)\text{Sc}(\eta^8\text{-C}_8\text{H}_8)]$  **1** (54 mg, 0.25 mmol) was reacted with LiTMP (37 mg, 0.25 mmol) in *n*-hexane (10 mL) at ambient temperature for 24 h. After that period of time, an aliquot from the *in situ* reaction mixture was analysed by NMR spectroscopy in  $[\text{D}_8]\text{THF}$ . Approximately 9% of **1** was lithiated to give  $[\text{Li}\{(\eta^5\text{-C}_5\text{H}_4)\text{Sc}(\eta^8\text{-C}_8\text{H}_8)\}]$  **2** as the unique metallated product. Lithiation at the Cot ( $\text{C}_8\text{H}_8$ ) ring was not detected.  $^1\text{H}$  NMR (400.1 MHz, 300 K,  $\text{C}_6\text{D}_6$ ):  $\delta$  **1** (91%): 5.13 (s, 5H,  $\text{C}_5\text{H}_5$ ), 6.34 (s, 8H,  $\text{C}_8\text{H}_8$ ); **2** (9%): 5.38 (m, 2H,  $\text{C}_5\text{H}_4$ ), 5.58 (m, 2H,  $\text{C}_5\text{H}_4$ ), 6.44 (s, 8H,  $\text{C}_8\text{H}_8$ ).

### 2.2 Synthesis of $[\text{THF}\cdot\text{Li}(\mu\text{-TMP})\{\mu\{(\eta^5\text{-C}_5\text{H}_4)\text{Sc}(\eta^8\text{-C}_8\text{H}_8)\}\}\text{Al}(i\text{Bu})_2]$ (**3**)

LiTMP (147 mg, 1 mmol) was added to a Schlenk tube containing a solution of  $i\text{Bu}_2\text{Al}(\text{TMP})$  (282 mg, 1 mmol) in *n*-hexane (10 mL) at ambient temperature and the reaction mixture was stirred for 10 min. Then, THF (0.08 mL, 1 mmol) was added via syringe to give an off-white suspension which was stirred for 10 min. Next,  $[(\text{C}_5\text{H}_5)\text{Sc}(\text{C}_8\text{H}_8)]$  **1** (171 mg, 0.8 mmol) was added and the reaction mixture was heated to reflux for 12 hours to give a pale yellow suspension. The solid was collected by filtration, washed with *n*-hexane (3 x 3 mL) and dried under vacuum for 15 min to give **3** as a pale yellow solid (330 mg, 0.57 mmol, 72%).

Single crystals of **3** suitable for an X-ray diffraction were obtained by adding THF (2 mL) to the resulting overnight hot suspension and allowing the resulting solution to cool to room temperature when the Schlenk tube was placed in a Dewar containing hot water for 24 h. The crystalline material was filtered, washed with *n*-hexane (3 x 3 mL) and dried under vacuum for 15 min (302 mg, 0.53 mmol, 66%).

The NMR spectroscopic study of the isolated solid and the crystalline material are identical. In addition, an NMR spectroscopic analysis of an *in situ* aliquot of the corresponding reaction mixture under reflux conditions overnight showed near quantitative conversion of **1** into **3**.

#### Characterization data for $[\text{THF}\cdot\text{Li}(\mu\text{-TMP})\{\mu\{(\eta^5\text{-C}_5\text{H}_4)\text{Sc}(\eta^8\text{-C}_8\text{H}_8)\}\}\text{Al}(i\text{Bu})_2]$ (**3**)

$^1\text{H}$  NMR (400.1 MHz, 300 K,  $[\text{D}_8]\text{THF}$ ):  $\delta$  -0.02 (m, 4H, 4 x  $\text{CH}_2$  of *i*Bu), 0.99 (d, 6H,  $^3J_{\text{HH}} = 6.4$  Hz, 2 x Me of *i*Bu), 1.01 (d, 6H,  $^3J_{\text{HH}} = 6.4$  Hz, 2 x Me of *i*Bu), 1.03 (s, 12H, Me of TMP), 1.13 (m, 4H, 2 x  $\beta\text{-CH}_2$  of TMP), 1.44 (m, 2H,  $\gamma\text{-CH}_2$  of TMP), 1.76 (m, 4H, 2 x  $\beta$

CH<sub>2</sub> of THF), 1.99 (sept, 2H, <sup>3</sup>J<sub>HH</sub> = 6.4 Hz, CH of *i*Pr), 3.61 (m, 4H, 2 x α-CH<sub>2</sub> of THF), 5.35 ("t", 2H, <sup>3</sup>J<sub>HH</sub> = 2.2 Hz, C<sub>5</sub>H<sub>4</sub>), 5.46 ("t", 2H, <sup>3</sup>J<sub>HH</sub> = 2.2 Hz, C<sub>5</sub>H<sub>4</sub>), 6.29 (s, 8H, C<sub>8</sub>H<sub>8</sub>). <sup>13</sup>C{<sup>1</sup>H} NMR (100.6 MHz, 300 K, [D<sub>8</sub>]THF): δ 20.0 (γ-CH<sub>2</sub>, TMP), 26.4 (2 x β-CH<sub>2</sub>, THF), 28.9 (2 x CH, *i*Bu), 29.4 (2 x Me, *i*Bu), 30.9 (2 x Me, *i*Bu), 34.6 (4 x Me, TMP), 45.4 (2 x β-CH<sub>2</sub>, TMP), 52.3 (2 x α-C, TMP), 68.2 (2 x α-CH<sub>2</sub>, THF), 92.2 (CH, C<sub>8</sub>H<sub>8</sub>), 93.3 (8 x CH, C<sub>8</sub>H<sub>8</sub>), 106.9 (2 x CH, C<sub>5</sub>H<sub>4</sub>), 118.3 (2 x CH, C<sub>5</sub>H<sub>4</sub>); note that the CAI resonances of the C<sub>5</sub>H<sub>4</sub>Al fragment could not be detected due to the quadrupolar nature of <sup>27</sup>Al nuclei. <sup>7</sup>Li NMR (155.5 MHz, 300 K, [D<sub>8</sub>]THF): δ 1.05. Anal. Calcd (Found) for C<sub>34</sub>H<sub>56</sub>AlLiNOSc: C, 71.18 (70.92); H, 9.84 (9.91); N, 2.44% (2.57%).

### 2.3 Synthesis of [(THF·Li(μ-TMP)Al(*i*Bu)<sub>2</sub>)<sub>2</sub>]{μ-[(<sup>η</sup><sup>5</sup>-C<sub>5</sub>H<sub>4</sub>)Sc(<sup>η</sup><sup>8</sup>-C<sub>8</sub>H<sub>7</sub>)]} (4)

LiTMP (331 mg, 2.25 mol) was added to a Schlenk tube containing a solution of *i*Bu<sub>2</sub>Al(TMP) (633 mg, 2.25 mmol) in methylcyclohexane (10 mL) at ambient temperature and the reaction mixture was stirred for 10 min. Then, THF (0.18 mL, 2.25 mmol) was added via syringe to give a solution which was stirred for 10 min. Next, [(<sup>η</sup><sup>5</sup>-C<sub>5</sub>H<sub>5</sub>)Sc(<sup>η</sup><sup>8</sup>-C<sub>8</sub>H<sub>8</sub>)] **1** (160 mg, 0.75 mmol) was added and the reaction mixture was heated to reflux for 3.5 h to give a pale yellow solution. The solution was filtered through Celite, concentrated under vacuum (5 mL). Single crystals of **4** suitable for an X-ray crystallographic study were obtained after 48 h at -27 °C. The crystalline material was filtered, rapidly washed with cold methylcyclohexane (2 mL) and dried under vacuum (298 mg, 0.32 mmol, 43 %).

An NMR spectroscopic analysis of an aliquot of the resulting *in situ* reaction mixture under reflux conditions in methylcyclohexane for 3.5 h showed near quantitative conversion of **1** into **4**.

#### Characterisation data for [(THF·Li(μ-TMP)Al(*i*Bu)<sub>2</sub>)<sub>2</sub>]{μ-[(<sup>η</sup><sup>5</sup>-C<sub>5</sub>H<sub>4</sub>)Sc(<sup>η</sup><sup>8</sup>-C<sub>8</sub>H<sub>7</sub>)]} (4)

<sup>1</sup>H NMR (400.1 MHz, 300 K, [D<sub>8</sub>]THF): δ 0.16-0.20 (m, 4H, 4 x CH<sub>2</sub> of *i*Bu), 0.29 (d, 4H, <sup>3</sup>J<sub>HH</sub> = 6.4 Hz, 4 x CH<sub>2</sub> of *i*Bu), 1.10 (d, 12H, <sup>3</sup>J<sub>HH</sub> = 6.4 Hz, 4 x Me of *i*Bu), 1.06 (m, 16H, 4 x Me of *i*Bu and β-CH<sub>2</sub> of TMP), 1.12 (s, 12H, 2 x Me of TMP), 1.31 (m, 16H, 2 x β-CH<sub>2</sub> and 4 x Me of TMP), 1.45 (m, 2H, γ-CH<sub>2</sub> of TMP), 1.61 (m, 2H, γ-CH<sub>2</sub> of TMP), 1.78 (m, 8H, 4 x β-CH<sub>2</sub> of THF), 2.11 (m, 4H, CH of *i*Pr), 3.63 (m, 8H, 4 x α-CH<sub>2</sub> of THF), 5.30 ("t", 2H, <sup>3</sup>J<sub>HH</sub> = 2.2 Hz, C<sub>5</sub>H<sub>4</sub>), 5.46 ("t", 2H, <sup>3</sup>J<sub>HH</sub> = 2.2 Hz, C<sub>5</sub>H<sub>4</sub>), 6.11-6.23 (m, 3H, C<sub>8</sub>H<sub>7</sub>), 6.27-6.33 (m, 2H, C<sub>8</sub>H<sub>7</sub>), 7.06 ("s", 1H, C<sub>8</sub>H<sub>7</sub>), 7.09 ("s", 1H, C<sub>8</sub>H<sub>7</sub>); note that small signals of TMPH and **1** are also observed as a result of unavoidable hydrolysis of **4**. <sup>13</sup>C{<sup>1</sup>H} NMR

(100.6 MHz, 300 K, [D<sub>8</sub>]THF):  $\delta$  19.6 ( $\gamma$ -CH<sub>2</sub>, TMP), 20.2 ( $\gamma$ -CH<sub>2</sub>, TMP), 25.8 (4 x  $\beta$ -CH<sub>2</sub>, THF), 28.7 (2 x CH, *i*Bu), 28.8 (2 x CH, *i*Bu), 29.8 (2 x Me, *i*Bu), 30.0 (2 x Me, *i*Bu), 30.6 (2 x Me, *i*Bu), 30.9 (2 x Me, *i*Bu), 32.3 (2 x CH<sub>2</sub>, *i*Bu), 34.2 (4 x Me, TMP), 34.9 (4 x Me, TMP), 45.1 (2 x  $\beta$ -CH<sub>2</sub>, TMP), 45.5 (2 x  $\beta$ -CH<sub>2</sub>, TMP), 52.7 (2 x  $\alpha$ -C, TMP), 52.8 (2 x  $\alpha$ -C, TMP), 68.3 (2 x  $\alpha$ -CH<sub>2</sub>, THF), 92.2 (CH, C<sub>8</sub>H<sub>7</sub>), 93.1 (2 x CH, C<sub>8</sub>H<sub>7</sub>), 95.6 (2 x CH, C<sub>8</sub>H<sub>7</sub>), 104.3 (2 x CH, C<sub>8</sub>H<sub>7</sub>), 107.7 (2 x CH, C<sub>5</sub>H<sub>4</sub>), 115.3 (2 x CH, C<sub>5</sub>H<sub>4</sub>); note that the CAI resonances from “C<sub>5</sub>H<sub>4</sub>Al” and “C<sub>8</sub>H<sub>7</sub>Al” could not be detected due to the quadrupolar nature of <sup>27</sup>Al nuclei. <sup>7</sup>Li NMR (155.5 MHz, 300 K, [D<sub>8</sub>]THF):  $\delta$  -1.2. Anal. Calcd (Found) for C<sub>55</sub>H<sub>99</sub>Al<sub>2</sub>Li<sub>2</sub>N<sub>2</sub>O<sub>2</sub>Sc: C, 70.79 (70.98); H, 10.69 (10.40); N, 3.00% (2.73%).

Note that resonances in the <sup>27</sup>Al NMR spectra of **3** and **4** and starting aluminium reagent *i*Bu<sub>2</sub>AlTMP are broadened such that they are essentially invisible due to the quadrupolar nature of <sup>27</sup>Al nuclei. Only the homoleptic aluminate gives a sharp signal as it is thought to be highly symmetrical.

## 2.4 Quenching Reaction of **3** with I<sub>2</sub>

A sample of monometallated **3** (100 mg, 174  $\mu$ mol) in Et<sub>2</sub>O (3 mL) was cooled to -40 °C and treated with I<sub>2</sub> (39.7 mg, 157  $\mu$ mol) in Et<sub>2</sub>O (1 mL). The orange reaction mixture was stirred for another 30 minutes and after filtration all volatiles were removed under vacuum. The resulting oily residue was sublimed at 130 °C at 10<sup>-3</sup> mbar yielding a small amount of slightly yellow solid that contained reprotonated **1** alongside a monosubstituted sandwich complex (Figure S21). Under HRMS conditions only the parent sandwich complex **1** was detected.

<sup>1</sup>H NMR (400.1 MHz, 300 K, C<sub>6</sub>D<sub>6</sub>):  $\delta$  4.83 (“t”, 2H, <sup>3</sup>J<sub>HH</sub> = 2.8 Hz, C<sub>5</sub>H<sub>4</sub>), 5.22 (“t”, 2H, <sup>3</sup>J<sub>HH</sub> = 2.8 Hz, C<sub>5</sub>H<sub>4</sub>), 6.34 (s, 8H, COT).

### 3 NMR Spectra

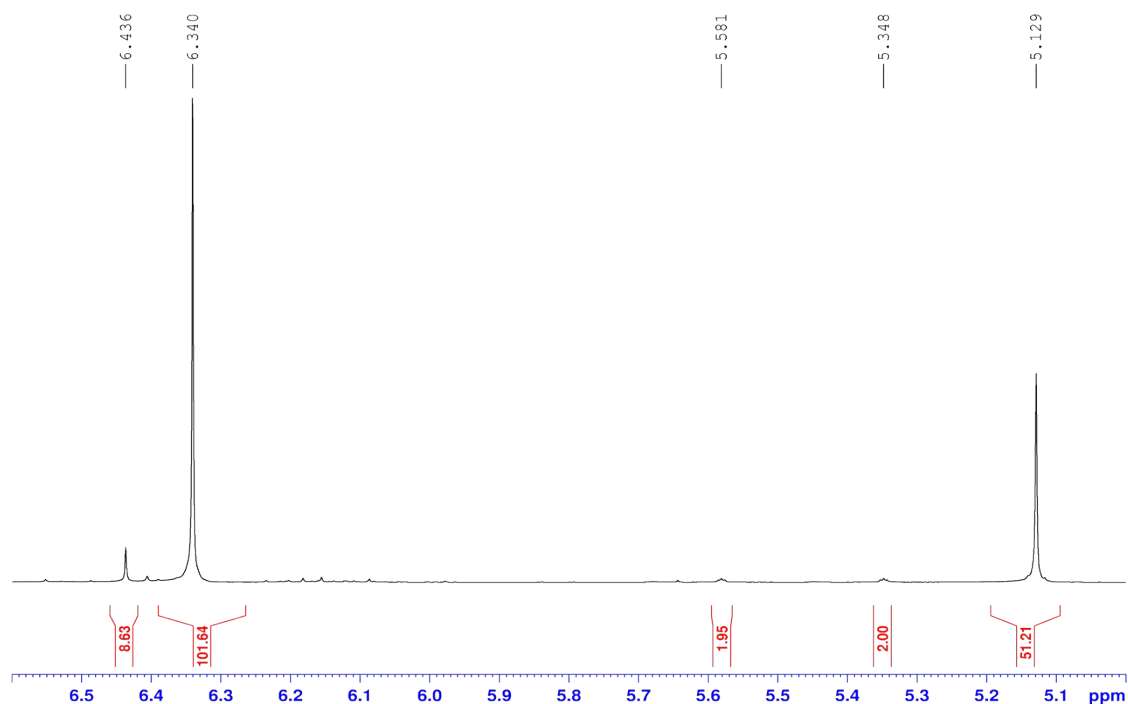

**Figure S1.**  $^1\text{H}$  NMR (400.1 MHz, 300 K,  $\text{C}_6\text{D}_6$ ) spectrum of an *in situ* aliquot from the reaction of **1** with LiTMP in 1:1 molar ratio at room temperature in *n*-hexane for 24 h.

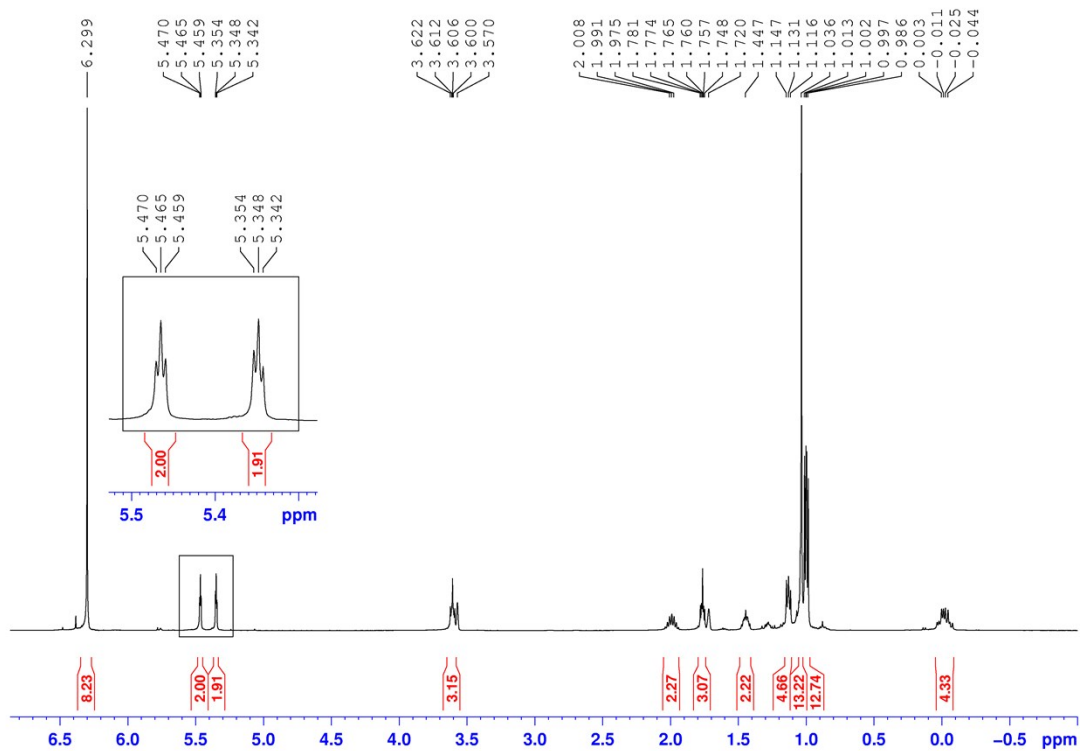

**Figure S2.**  $^1\text{H}$  NMR (400.1 MHz, 300 K,  $[\text{D}_8]\text{THF}$ ) spectrum of **3**.

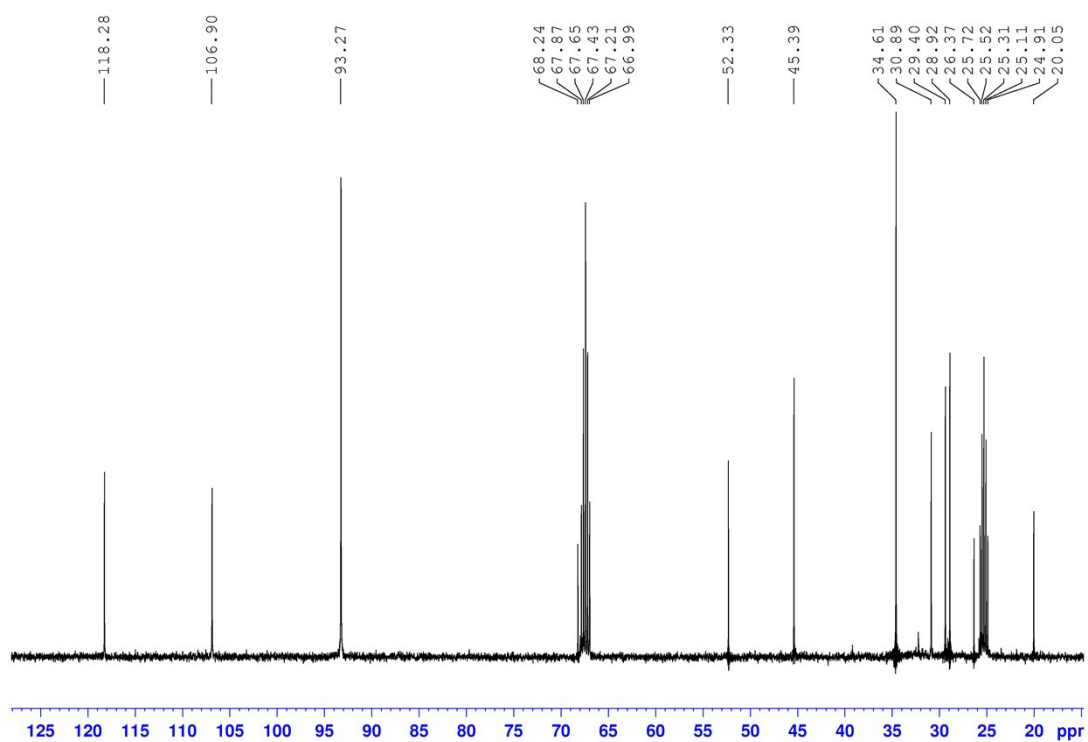

**Figure S3.**  $^{13}\text{C}\{^1\text{H}\}$  NMR (100.6 MHz, 300 K,  $[\text{D}_8]\text{THF}$ ) spectrum of **3**.

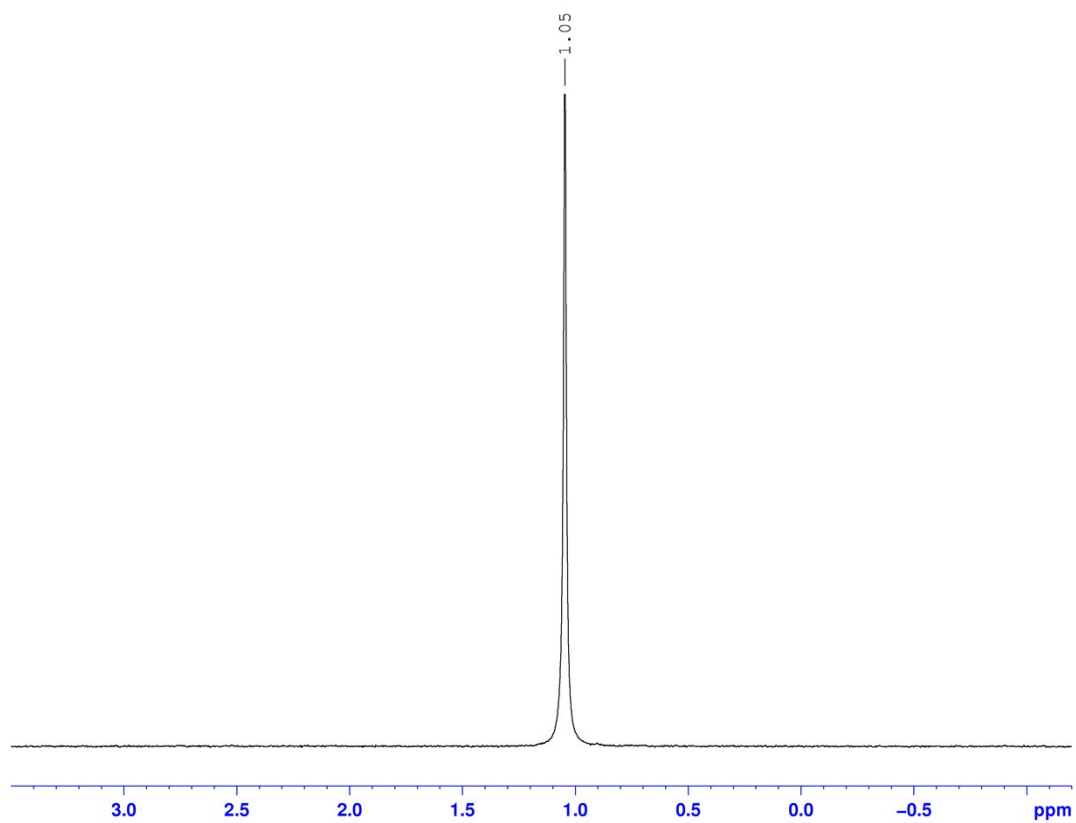

**Figure S4.**  $^7\text{Li}$  NMR (155.6 MHz, 300 K,  $[\text{D}_8]\text{THF}$ ) spectrum of **3**.



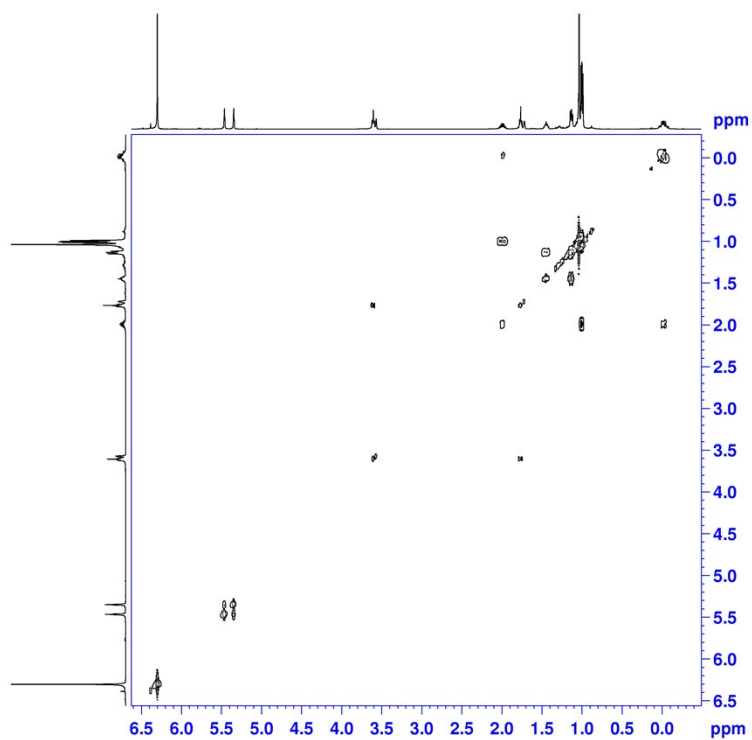

**Figure S5.**  $^1\text{H},^1\text{H}$ -COSY NMR (400.1 MHz, 300 K,  $[\text{D}_8]$ THF) spectrum of **3**.

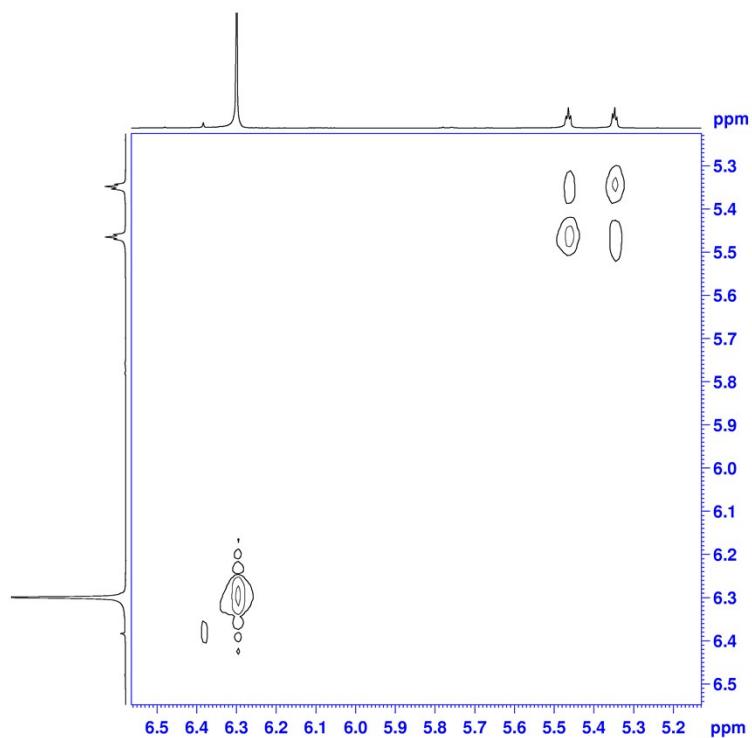

**Figure S6.** Section of the  $^1\text{H},^1\text{H}$ -COSY NMR (400.1 MHz, 300 K,  $[\text{D}_8]$ THF) spectrum of **3**.

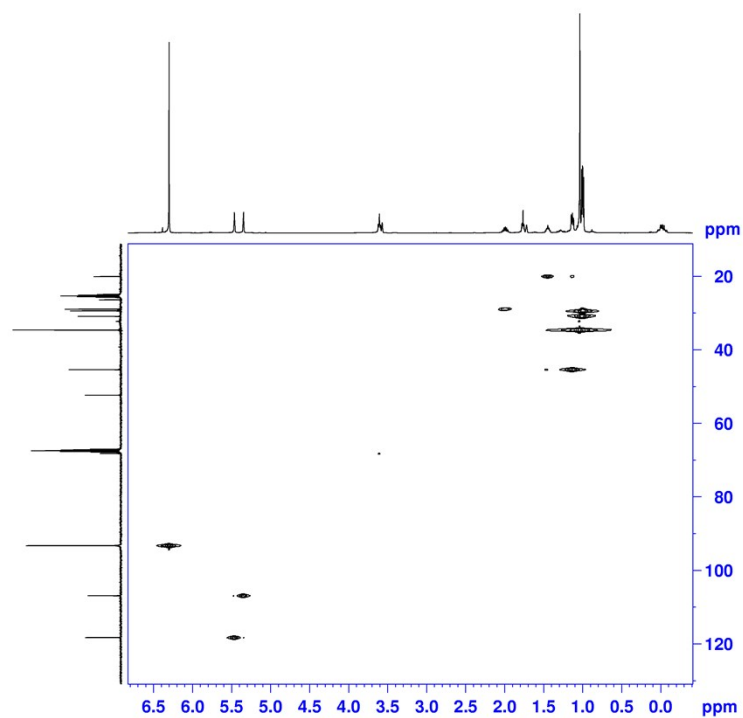

**Figure S7.**  $^1\text{H}$ ,  $^{13}\text{C}$ -HSQC NMR (400.1 MHz, 300 K,  $[\text{D}_8]$ THF) spectrum of **3**.

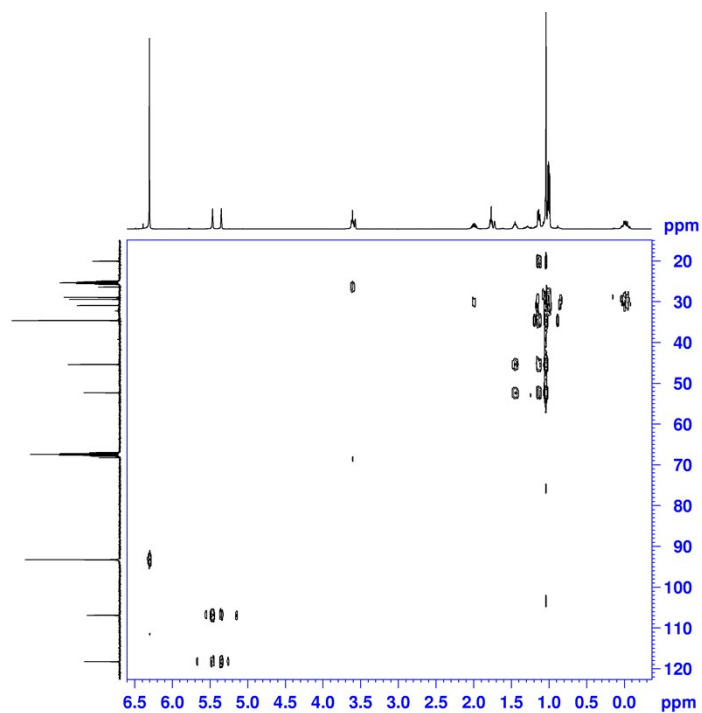

**Figure S8.**  $^1\text{H}$ ,  $^{13}\text{C}$ -HMBC NMR (400.1 MHz, 300 K,  $[\text{D}_8]$ THF) spectrum of **3**.

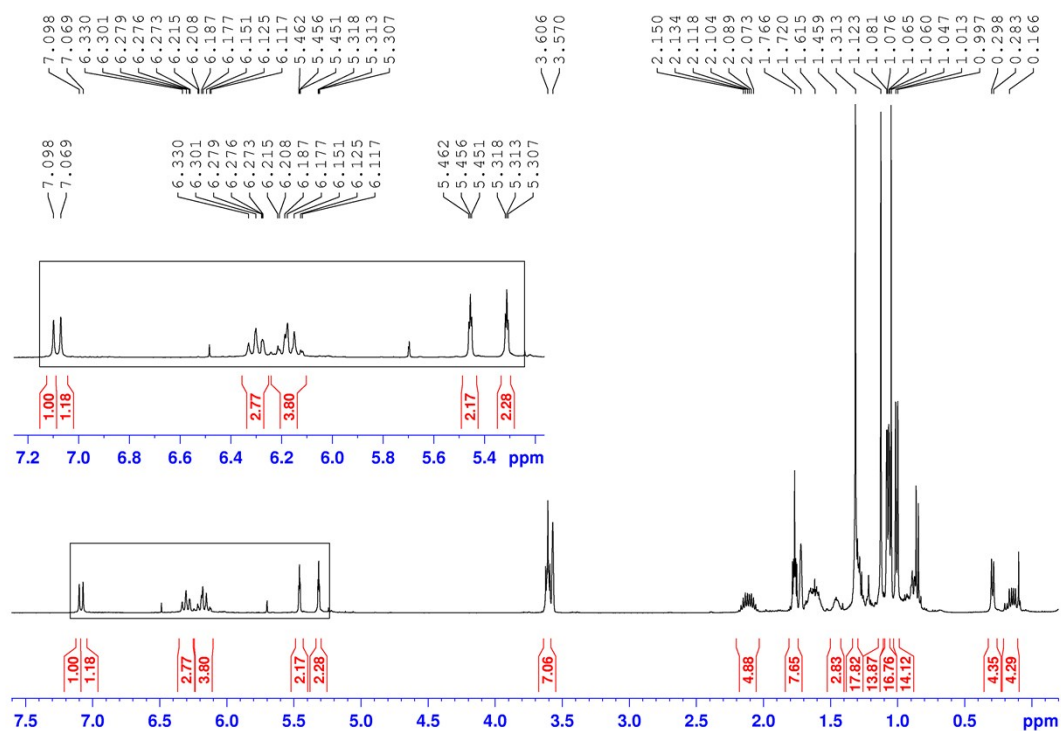

Figure S9.  $^1\text{H}$  NMR (400.1 MHz, 300 K,  $[\text{D}_8]\text{THF}$ ) spectrum of **4**.

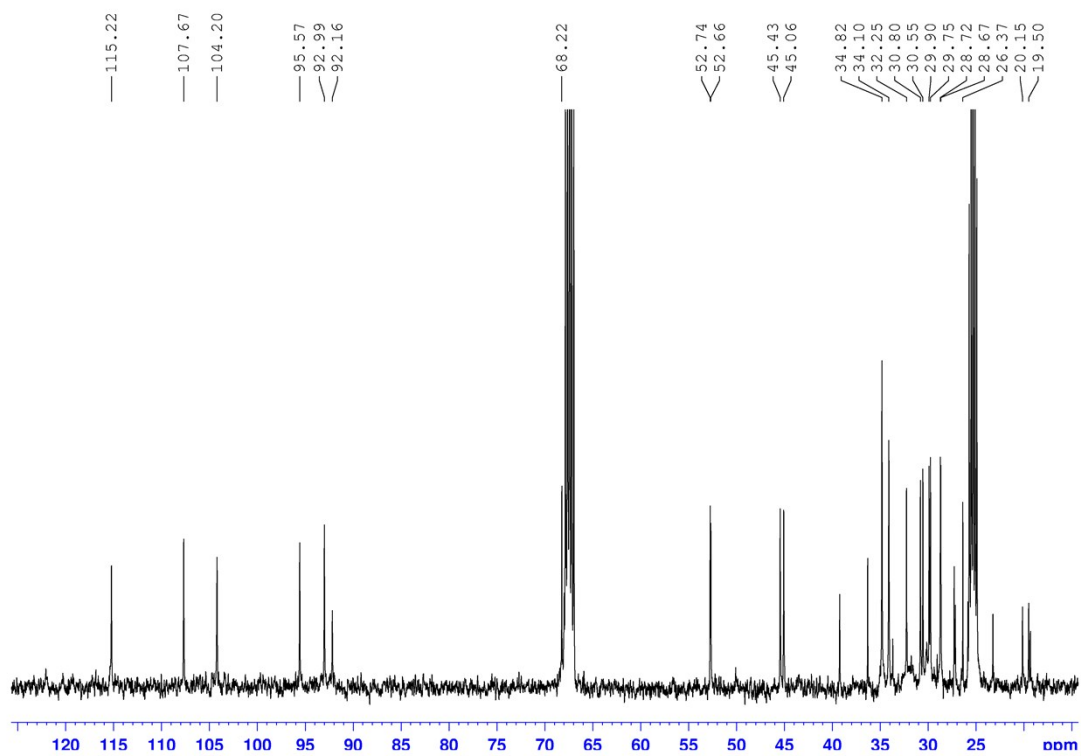

Figure S10.  $^{13}\text{C}\{^1\text{H}\}$  NMR (100.6 MHz, 300 K,  $[\text{D}_8]\text{THF}$ ) spectrum of **4**.

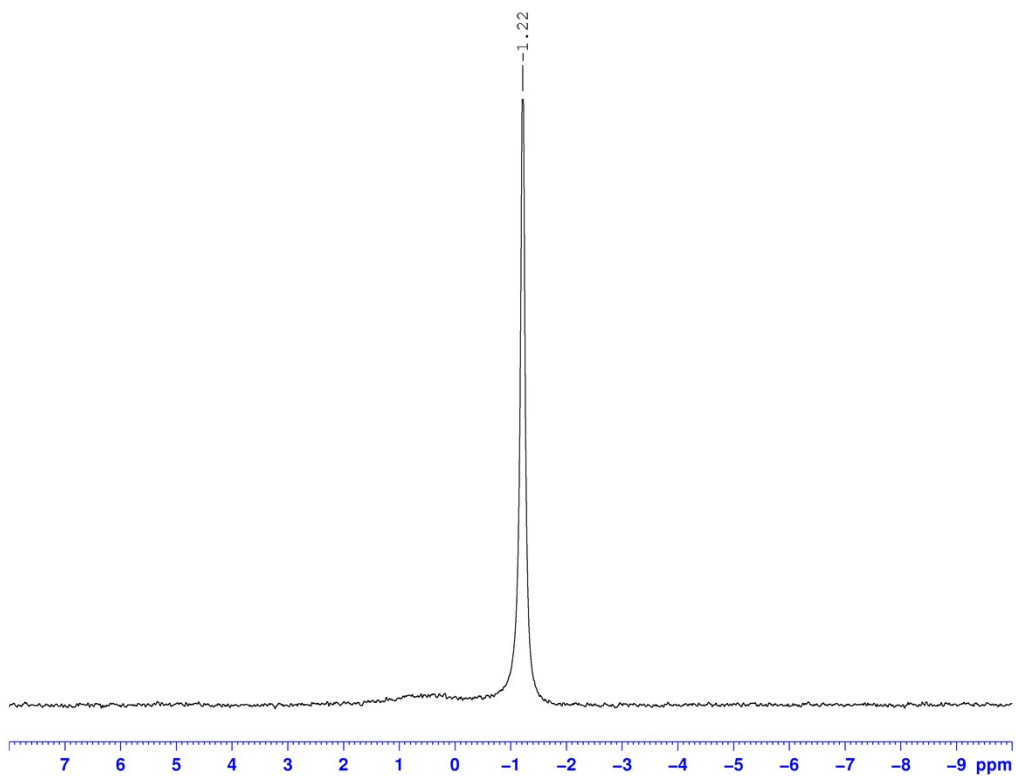

**Figure S11.**  $^7\text{Li}$  NMR (155.6 MHz, 300 K,  $[\text{D}_8]\text{THF}$ ) spectrum of **4**.

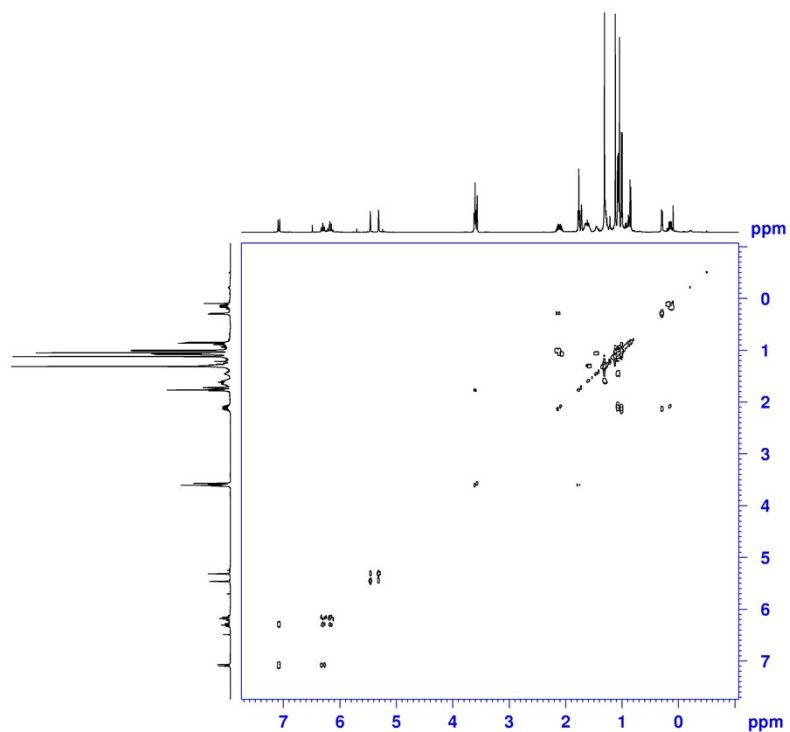

**Figure S12.**  $^1\text{H}, ^1\text{H}$ -COSY NMR (400.1 MHz, 300 K,  $[\text{D}_8]\text{THF}$ ) spectrum of **4**.

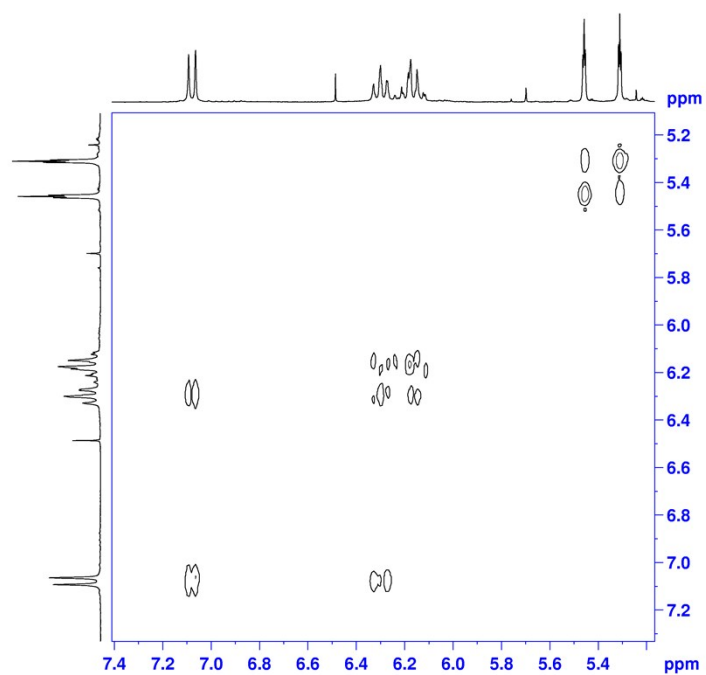

**Figure S13.** Section of the  $^1\text{H}$ ,  $^1\text{H}$ -COSY NMR (400.1 MHz, 300 K,  $[\text{D}_8]$ THF) spectrum of **4**.

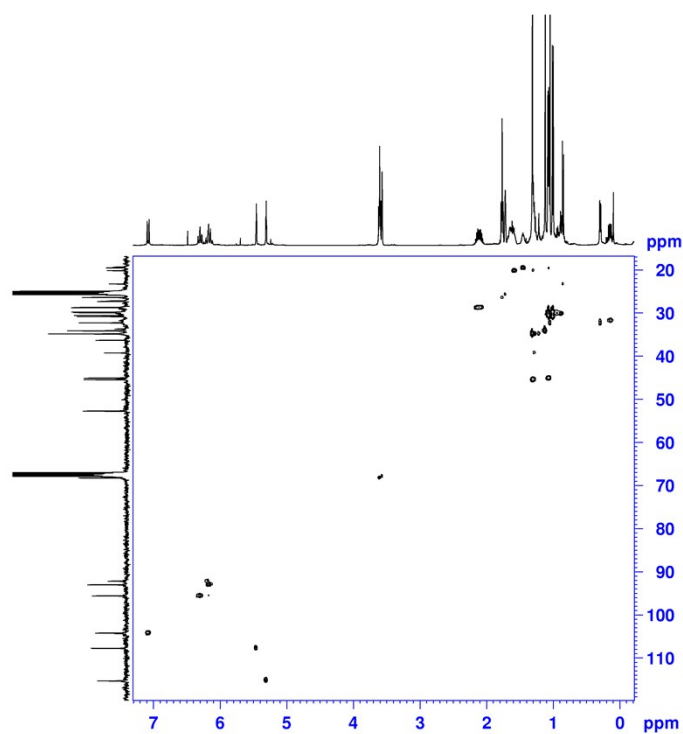

**Figure S14.**  $^1\text{H}$ ,  $^{13}\text{C}$ -HSQC NMR (400.1 MHz, 300 K,  $[\text{D}_8]$ THF) spectrum of **4**.

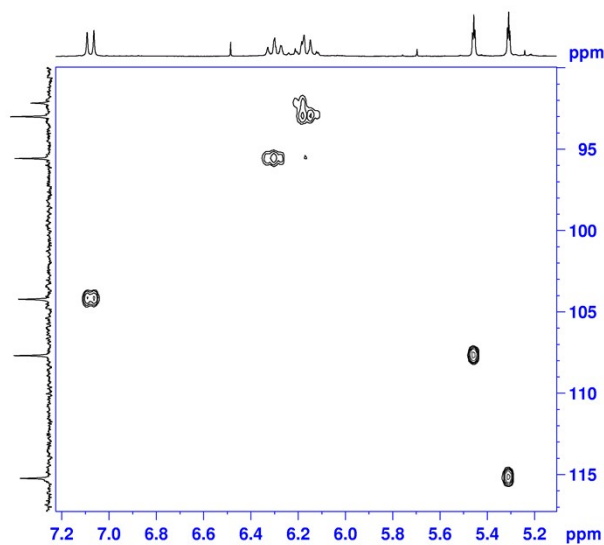

**Figure S15.** Section of the  $^1\text{H},^{13}\text{C}$ -HSQC NMR (400.1 MHz, 300 K,  $[\text{D}_8]$ THF) spectrum of **4**.

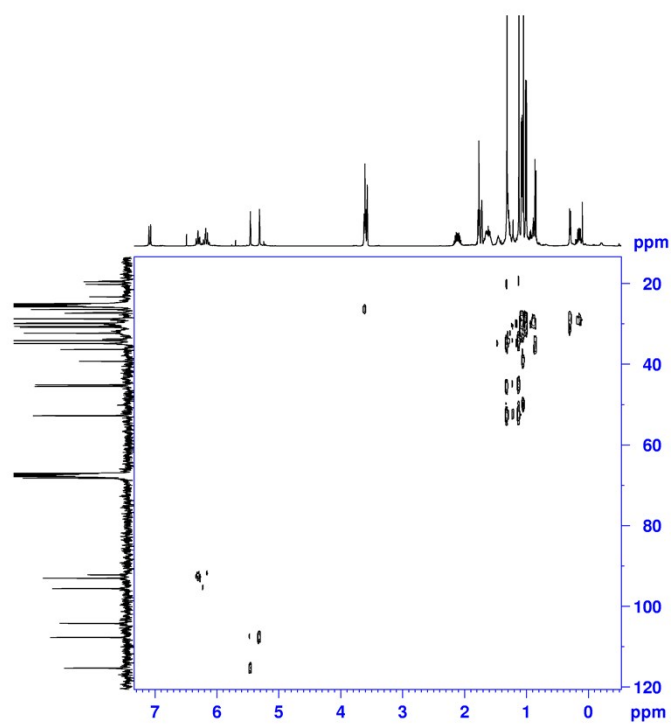

**Figure S16.**  $^1\text{H},^{13}\text{C}$ -HMBC NMR (400.1 MHz, 300 K,  $[\text{D}_8]$ THF) spectrum of **4**.

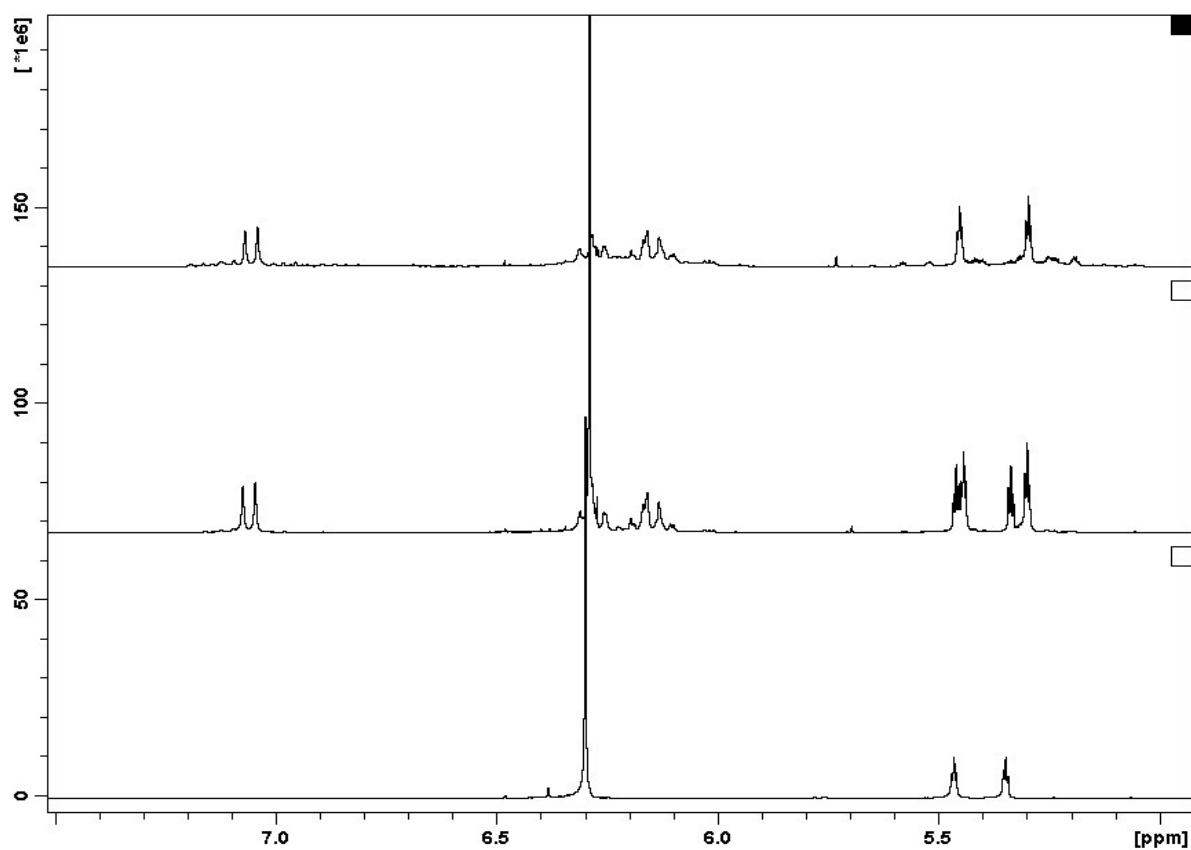

**Figure S17.** <sup>1</sup>H NMR (400.1 MHz, 300 K, [D<sub>8</sub>]THF) spectra of an *in situ* reaction mixture of **1** and “LiTMP/*i*Bu<sub>2</sub>AlTMP/THF” in 1:3 molar ratio under reflux conditions in methylcyclohexane for 3.5 h (top, full conversion to **4**), 1:2 molar ratio in methylcyclohexane under reflux conditions for 3.5 h (middle, mixture **3**:**4** in 0.4:0.6 ratio) and 1:1.2 molar ratio in *n*-hexane under reflux conditions overnight (bottom, full conversion to **3**).

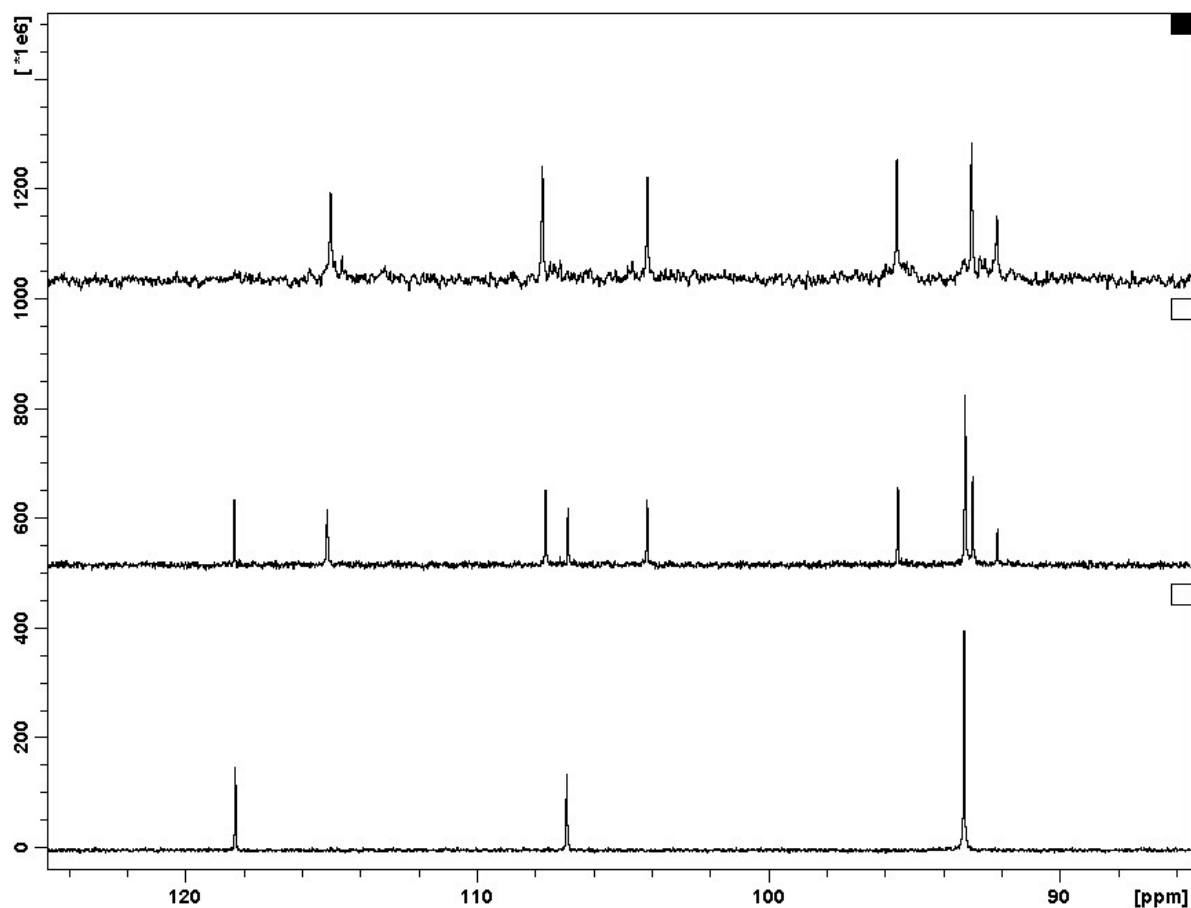

**Figure S18.**  $^{13}\text{C}$  NMR (100.6 MHz, 300 K,  $[\text{D}_8]\text{THF}$ ) spectra of an *in situ* reaction mixture of **1** and “LiTMP/*i*Bu<sub>2</sub>AlTMP/THF” in 1:3 molar ratio under reflux conditions in methylcyclohexane for 3.5 h (top, full conversion to **4**), 1:2 molar ratio in methylcyclohexane under reflux conditions for 3.5 h (middle, mixture **3**:**4** in 0.4:0.6 ratio) and 1:1.2 molar ratio in *n*-hexane under reflux conditions overnight (bottom, full conversion to **3**).



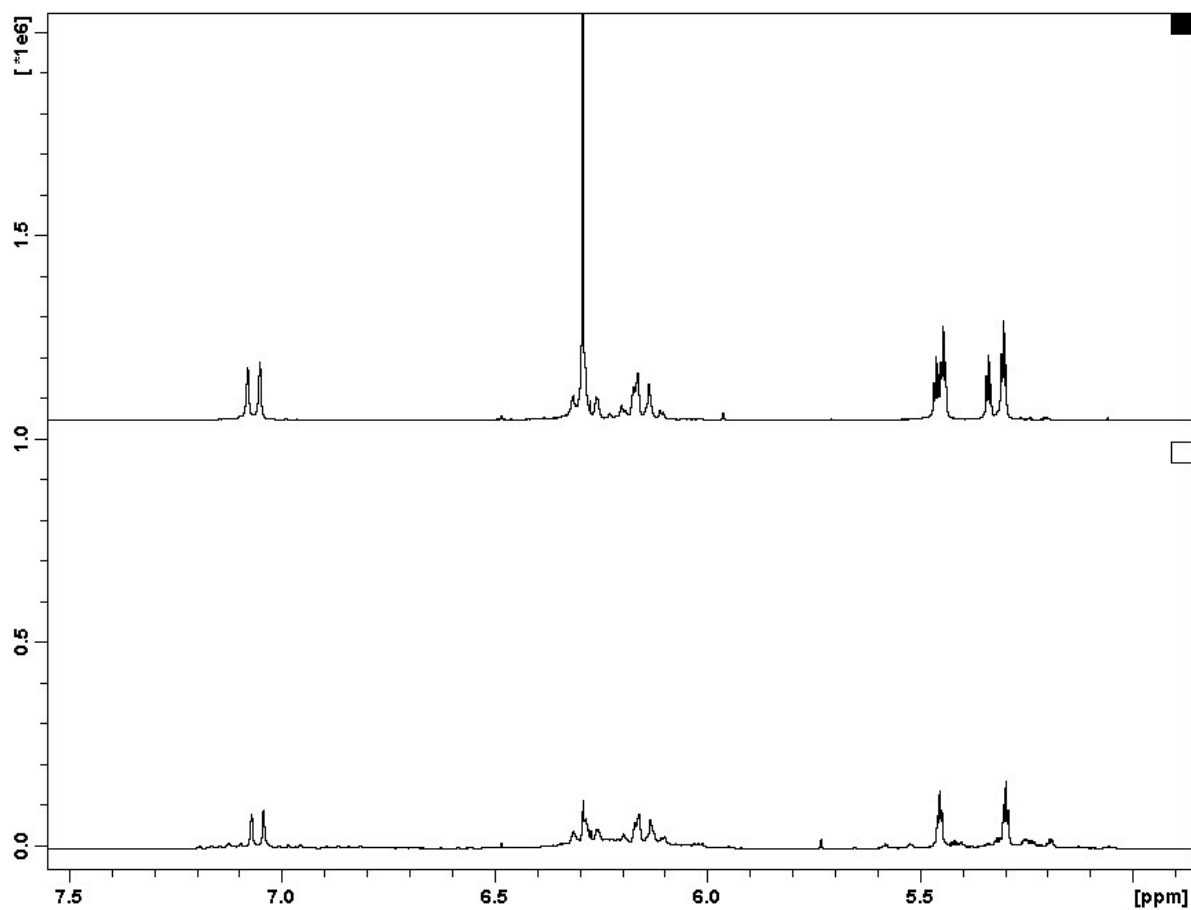

**Figure S19.** <sup>1</sup>H NMR (400.1 MHz, 300 K, [D<sub>8</sub>]THF) spectra of an *in situ* reaction mixture of **1** and “LiTMP/*i*Bu<sub>2</sub>AlTMP/THF” in 1:3 molar ratio under reflux conditions in *n*-hexane for 3.5 h (top, mixture **3**:**4** in 0.4:0.6 ratio) and in methylcyclohexane under reflux (bottom, full conversion to **4**).

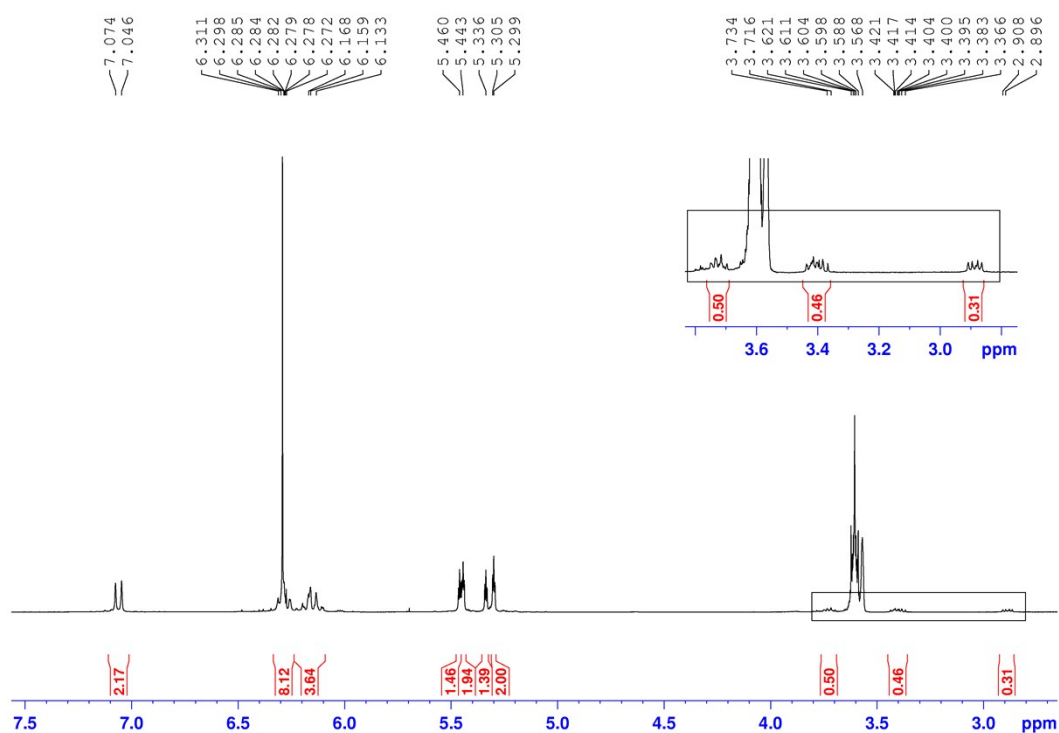

**Figure S20.**  $^1\text{H}$  NMR (400.1 MHz, 300 K,  $[\text{D}_8]\text{THF}$ ) spectra of an *in situ* reaction mixture of **1** and “LiTMP/*i*Bu<sub>2</sub>AlTMP/THF” in 1:2 molar ratio under reflux conditions in methylcyclohexane for 3.5 h to give a 0.4:0.6 mixture of **3**:**4**.  $\alpha$ -Metallation of THF (approximately 10%) is also detected (square box).

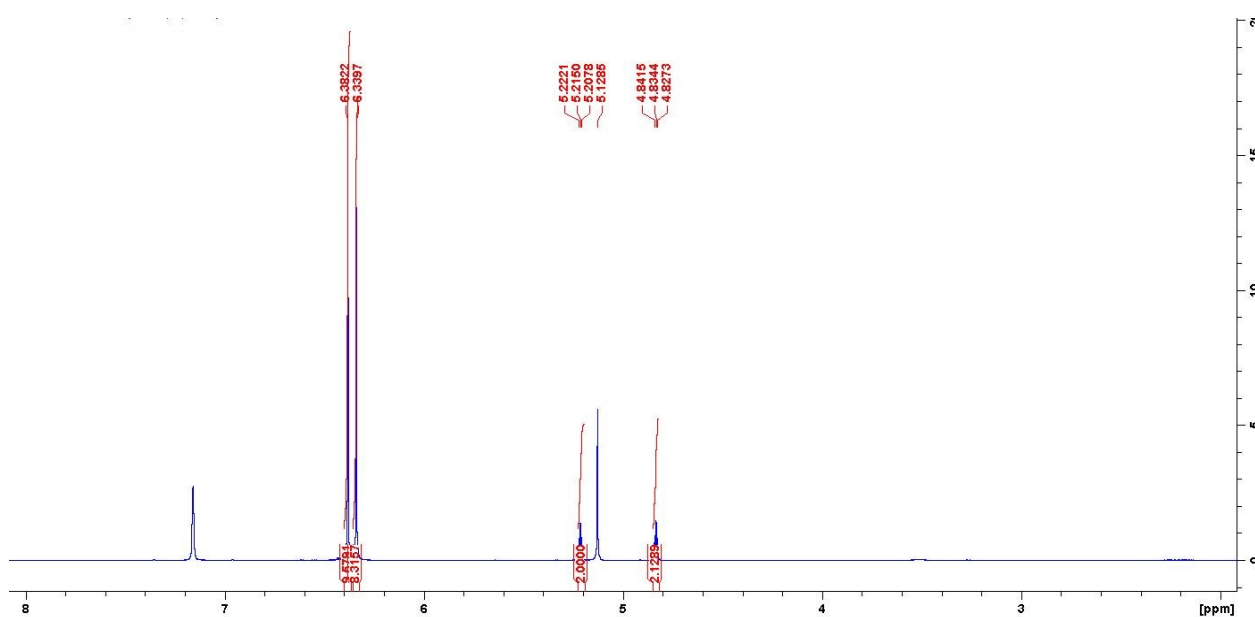

**Figure S21.**  $^1\text{H}$  NMR (400.1 MHz, 300 K,  $\text{C}_6\text{D}_6$ ) spectra of sublimed product of the reaction of **3** with 0.8 eq.  $\text{I}_2$ , showing a mixture of reprotated **1** and a monosubstituted product.

## 4 <sup>1</sup>H DOSY NMR Analyses

### 4.1 General Considerations

The diffusion-ordered spectroscopy (DOSY) NMR experiments were performed on a Bruker AVANCE 400 MHz NMR spectrometer at 300 K operating at 400.1 MHz for <sup>1</sup>H under TopSpin (version 2.0, Bruker Biospin, Karlsruhe) and equipped with a BBFO-z-atm probe with actively shielded z-gradient coil capable of delivering a maximum gradient strength of 54 G cm<sup>-1</sup>. Diffusion-ordered NMR data were acquired using the Bruker pulse program *dstepp3s* with a double stimulated echo with three spoiling gradients. Sine-shaped gradient pulses were used with a duration of 4 ms together with a diffusion period of 100 ms. Gradient recovery delays of 200 μs followed the application of each gradient pulse. Data were systematically accumulated by linearly varying the diffusion encoding gradients over a range from 2% to 95% of maximum for 64 gradient increment values. The signal decay dimension on the *pseudo*-2D data was generated by Fourier transformation of the time-domain data. DOSY plots were generated by use of the DOSY processing module of TopSpin. Parameters were optimized empirically to find the best quality of data for presentation purposes. Diffusion coefficients were calculated by fitting intensity data to the Stejskal-Tanner expression. For **3**, from the diffusion coefficients of the internal standards used (1,2,3,4-tetraphenyl-naphthalene, 1-phenyl-naphthalene and tetramethylsilane), linear calibration graphs were obtained by plotting *logD* versus *logMW*. Using the diffusion coefficients for the signals corresponding to the corresponding compound, an estimate of the MW of the species present in solution was obtained.<sup>3</sup> For **4**, from the diffusion coefficients of the internal 1-phenyl-naphthalene and the linear calibration graphs obtained by using external calibration curves with normalized diffusion coefficients,<sup>4</sup> an estimate of the MW of the species present in solution was obtained.

### 4.2 DOSY NMR Sample Preparation

To an NMR tube containing the corresponding compound to be analysed (10 mg of **3** and 20 mg of **4**), the appropriate solvent (0.5 mL) was added to dissolve the compound. A series of solvent-soluble inert internal standards 1,2,3,4-tetraphenyl-naphthalene (TPhN, 15 mg), 1-phenyl-naphthalene (PhN, 13.2 μL) and tetramethylsilane (TMS, 19.1 μL) were then added to **3**, and (PhN, 4 μL) was added to **4**.

### 4.3 $^1\text{H}$ DOSY NMR Study of Compound **3** in $[\text{D}_8]\text{THF}$

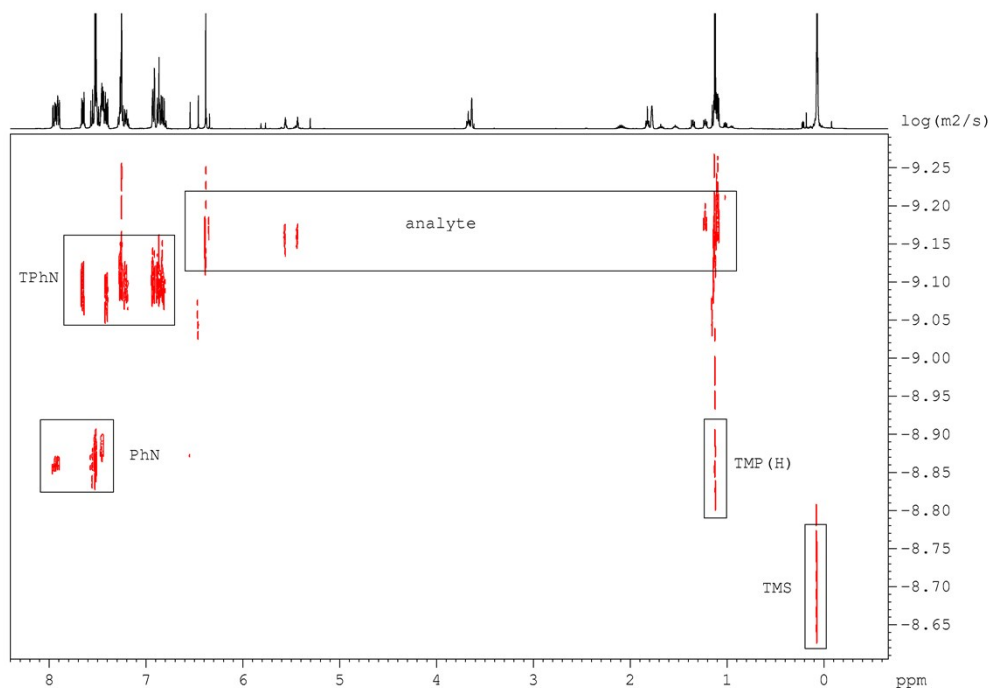

**Figure S22.**  $^1\text{H}$  DOSY NMR plot of **3** in  $[\text{D}_8]\text{THF}$  solution (5 mg/mL, 400.1 MHz, 300 K). Small signals of TMP(H) were present due to unavoidable hydrolysis of **3**.

From the D values obtained for the internal standards a linear calibration graph of LogD versus LogMW was obtained (Figure S21), with formula  $\log D = -0.5861 (\log \text{MW}) - 7.5323$ . Using the D values for **3** and the calibration graph, the MW of species in solution is estimated (Table S2).

**Table S2.** Diffusion coefficients and MW of internal standards.

| Standard    | MW ( $\text{g mol}^{-1}$ ) | $\log \text{MW}$ | D ( $\text{m}^2 \text{s}^{-1}$ ) | $\log D$ |
|-------------|----------------------------|------------------|----------------------------------|----------|
| <b>TPhN</b> | 432.55                     | 2.636            | 8.13-10                          | -9.090   |
| <b>PhN</b>  | 204.27                     | 2.310            | 1.37E-9                          | -8.863   |
| <b>TMS</b>  | 88.22                      | 1.946            | 2.07E-9                          | -8.684   |

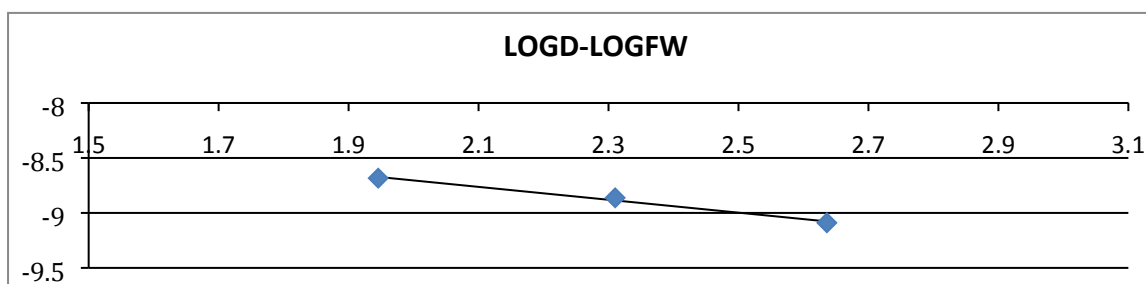

**Figure S23.** Calibration graph ( $\log D = -0.5861 (\log MW) - 7.5323$ ,  $R^2 = 0.99$ ) used to estimate of MW of compound of **3** in  $[D_8]THF$  solution.

**Table S3.** Diffusion coefficients and corresponding calculated  $MW_{DOSY}$  for components present in  $[D_8]THF$  solution for **3**.

| Component of spectrum | D ( $m^2 s^{-1}$ ) | $MW_{DOSY}^a$ ( $g mol^{-1}$ ) |
|-----------------------|--------------------|--------------------------------|
| <b>3</b>              | 6.92E-10           | 598.2                          |

<sup>a</sup> MW from [ $\log D = -0.5861 (\log MW) - 7.5323$ ,  $R^2 = 0.99$ ]

The  $MW_{DOSY}$  value obtained was compared to the actual MW of various species which may be present in the solution. The error of the  $MW_{DOSY}$  values with respect to these species was also determined. The results are shown in Table S4.

**Table S4.** Comparison of  $MW_{DOSY}$  to the MW of possible species.

| Possible Species                                                                 | MW <sup>a</sup> | $MW_{DOSY}^b$ | Error (%) in $MW_{DOSY}$ |
|----------------------------------------------------------------------------------|-----------------|---------------|--------------------------|
| $[(D_8)THF] \cdot Li(\mu-TMP)\{\mu-(\eta^5-C_5H_4)Sc(\eta^8-C_8H_8)\}Al(iBu)_2]$ | 581.7           | 598.2         | 3                        |

<sup>a</sup> Real MW ( $g mol^{-1}$ ), <sup>b</sup> MW ( $g mol^{-1}$ ) from [ $\log D = -0.5861 (\log MW) - 7.5323$ ,  $R^2 = 0.99$ ]

The  $^1H$  DOSY signals of **3** in  $[D_8]THF$  solution gave a D value in correlation with a  $MW_{DOSY}$  which is in agreement with the empirical formula  $[(D_8)THF]Li(\mu-TMP)\{\mu-(\eta^5-C_5H_4)Sc(\eta^8-C_8H_8)\}Al(iBu)_2]$  (Figure S21 and Table S4, MW 581.7  $g mol^{-1}$ ;  $MW_{DOSY}$  598.2  $g mol^{-1}$ ; error 3%). The data could be consistent with a single species  $[(D_8)THF]Li(\mu-TMP)\{\mu-(\eta^5-C_5H_4)Sc(\eta^8-C_8H_8)\}Al(iBu)_2]$  existing in a  $[D_8]THF$  solution of **3**.

#### 4.4 <sup>1</sup>H DOSY NMR Study of Compound 4 in [D<sub>8</sub>]THF

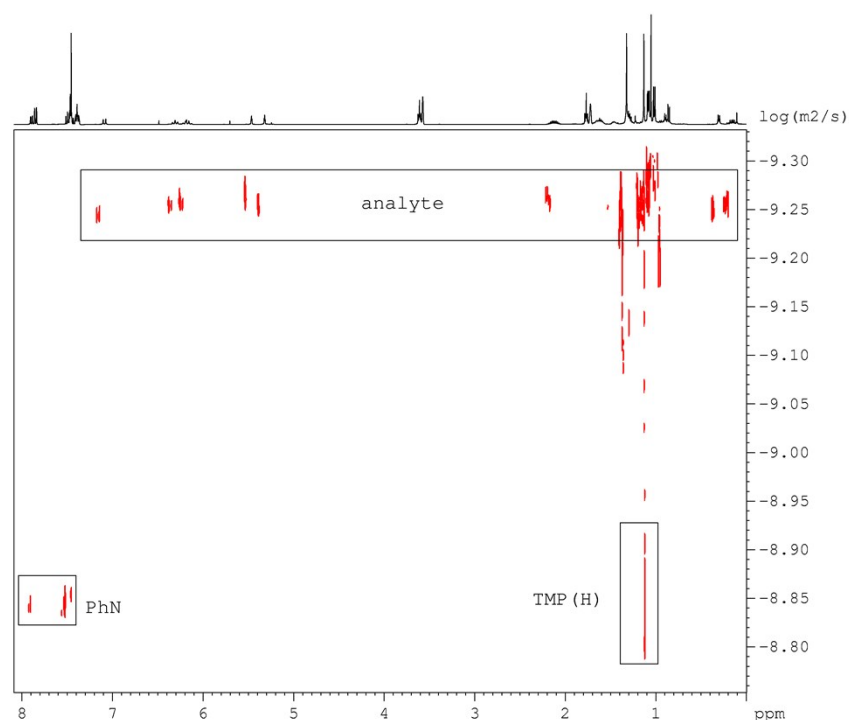

**Figure S24.** <sup>1</sup>H DOSY NMR plot of **3** in [D<sub>8</sub>]THF solution (10 mg/mL, 400.1 MHz, 300 K). Small signals of TMP(H) were present due to unavoidable hydrolysis of **4**.

From the D values obtained for the internal standard 1-phenylnaphthalene and **4**, and using the use of the reported external calibration curves in [D<sub>8</sub>]THF solution<sup>4</sup> the MW of species in solution is estimated. The MW<sub>DOSY</sub> value obtained was compared to the actual MW of various species which may be present in the solution. The error of the MW<sub>DOSY</sub> values with respect to these species was also determined. The results are shown in Table S5.

**Table S5.** Comparison of MW<sub>DOSY</sub> to the MW of possible species.

| Possible Species                                                        | MW <sup>a</sup> | MW <sub>DOSY</sub> <sup>b</sup> | Error (%) in MW <sub>DOSY</sub> |
|-------------------------------------------------------------------------|-----------------|---------------------------------|---------------------------------|
| $\{[(D_8)THF] \cdot Li(\mu-TMP)Al(iBu)_2\}_2\{\mu-(C_5H_4)Sc(C_8H_7)\}$ | 949.3           | 993.0                           | -5                              |

The  $^1\text{H}$  DOSY signals of **4** in  $[\text{D}_8]\text{THF}$  solution gave a  $D$  value in correlation with a  $\text{MW}_{\text{DOSY}}$  which is in agreement with the empirical formula  $[\{([\text{D}_8]\text{THF})\cdot\text{Li}(\mu\text{-TMP})\text{Al}(i\text{Bu})_2\}_2\{\mu\text{-}\{(\text{C}_5\text{H}_4)\text{Sc}(\text{C}_8\text{H}_7)\}\}],$   $\text{MW } 949.3 \text{ g mol}^{-1};$   $\text{MW}_{\text{DOSY}} 993.0 \text{ g mol}^{-1};$  error -5%). The data could be consistent with a single species  $[\{([\text{D}_8]\text{THF})\text{Li}(\mu\text{-TMP})\text{Al}(i\text{Bu})_2\}_2\{\mu\text{-}\{(\eta^5\text{-C}_5\text{H}_4)\text{Sc}(\eta^8\text{-C}_8\text{H}_7)\}\}]$  existing in a  $[\text{D}_8]\text{THF}$  solution of **4**.

## 5 X-ray Crystallography

### Single-crystal data collection details

Single-crystal data crystal for **3** and **4** were recorded at 123(2) K on an Oxford Diffraction Gemini diffractometer Cu K $\alpha$  ( $\lambda = 1.54184$  Å) radiation. Structures were refined to convergence on  $F^2$  against all independent reflections by the full-matrix least-squares method using the SHELXL programs.<sup>5</sup> All non-hydrogen atoms were refined using anisotropic thermal parameters. The structure of monometallated **3** was refined as a two-component twin. For **4**, the geometries of the disordered groups were restrained to approximate typical values. In addition, for **4** the SQUEEZE routine within PLATON<sup>6</sup> was used to remove approximately 291 electron equivalents from 759 Å<sup>3</sup> of “void” space per unit cell. This corresponds to approximately five molecules of methylcyclohexane per unit cell. Selected crystallographic details and refinement details are given in Table S6. CCDC 1909622 (**3**) and 1909623 (**4**) contain the supplementary crystallographic data for this paper. These data can be obtained free of charge from <http://www.ccdc.cam.ac.uk>.

**Table S6.** Selected crystallographic and refinement data for **3** and **4**.

| Compound              | <b>3</b>                                 | <b>4</b>                                                                                         |
|-----------------------|------------------------------------------|--------------------------------------------------------------------------------------------------|
| Formula               | C <sub>34</sub> H <sub>56</sub> AlLiNOSc | C <sub>55</sub> H <sub>99</sub> Al <sub>2</sub> Li <sub>2</sub> N <sub>2</sub> O <sub>2</sub> Sc |
| Fw                    | 573.67                                   | 933.16                                                                                           |
| Cryst. System         | Monoclinic                               | Tetragonal                                                                                       |
| Space Group           | <i>P2<sub>1</sub>/n</i>                  | <i>P4<sub>2</sub>/mbc</i>                                                                        |
| Wavelength/Å          | 1.54184                                  | 1.54184                                                                                          |
| <i>a</i> /Å           | 11.11866(14)                             | 20.6285(4)                                                                                       |
| <i>b</i> /Å           | 15.1374(2)                               | 20.6285(4)                                                                                       |
| <i>c</i> /Å           | 19.5596(3)                               | 14.8136(5)                                                                                       |
| $\alpha$ /°           | 90                                       | 90                                                                                               |
| $\beta$ /°            | 97.9689(14)                              | 90                                                                                               |
| $\gamma$ /°           | 90                                       | 90                                                                                               |
| Volume/Å <sup>3</sup> | 3260.26(8)                               | 6303.7(3)                                                                                        |
| Z                     | 4                                        | 4                                                                                                |
| Temp./K               | 123(2)                                   | 123(2)                                                                                           |
| Refls. Collect.       | 22387                                    | 22083                                                                                            |
| $2\theta_{\max}$      | 146.9                                    | 140                                                                                              |
| $R_{\text{int}}$      | 0.0339                                   | 0.0577                                                                                           |



|                         |         |         |
|-------------------------|---------|---------|
| Refls. Unique           | 22387   | 3105    |
| Reflns. Obs.            | 19031   | 2072    |
| Goodness of fit         | 1.041   | 1.044   |
| $R[F^2 > 2\sigma], F$   | 0.0463  | 0.0900  |
| $R_w$ (all data), $F^2$ | 0.1266  | 0.2919  |
| CCDC Nr.                | 1909622 | 1909623 |

---

## 6 Computational Details

The geometry optimizations of **1**, **3** and **4** were carried out starting from the experimental molecular structures characterized in the solid state by X-ray diffraction studies. We performed Density Functional Theory calculations using B3LYP as functional and a double-zeta quality Pople 6-31+G\* basis set with diffuse and polarization functions for optimizing the geometries. Stability tests on the single-determinant wavefunctions at the optimized structures were also performed, and no internal instabilities were found. We observed only small deviations between the optimized geometries and the X-ray diffraction molecular structures. Hessian calculations and thermochemical analysis were obtained at the same level of theory. The optimized geometries were characterized as minimum energy structures in their respective potential energy surfaces, as all vibrational frequencies were found to be real. We then performed single-point calculations at the DFT/6-311++G\*\* level with the B3LYP, M06L and TPSSH functionals in order to obtain the frontier Molecular Orbitals. The calculated orbitals were found to be similar irrespective of the DFT functional, and therefore we focused our analysis on the FMOs obtained at the B3LYP/6-311++G\*\* level. All calculations were done with the Gaussian 16 program package.<sup>7</sup>

### 6.1 Cartesian Coordinates (B3LYP/6-31+G\*)

| <b>1</b> |              |              |              |
|----------|--------------|--------------|--------------|
| Sc       | -2.760233000 | 1.481266000  | -0.166943000 |
| C        | -0.485393000 | 0.531375000  | 0.068920000  |
| C        | -0.688397000 | 1.385233000  | 1.186547000  |
| H        | -0.747801000 | 1.074548000  | 2.223098000  |
| C        | -0.800459000 | 2.718002000  | 0.706316000  |
| H        | -0.960596000 | 3.602071000  | 1.312305000  |
| C        | -0.666544000 | 2.687898000  | -0.708109000 |
| H        | -0.706451000 | 3.545064000  | -1.370028000 |
| C        | -4.222506000 | -0.167972000 | 0.814197000  |
| H        | -4.055694000 | -1.010508000 | 1.480680000  |
| C        | -0.471994000 | 1.336426000  | -1.102068000 |

|   |              |              |              |
|---|--------------|--------------|--------------|
| H | -0.337337000 | 0.981970000  | -2.117328000 |
| C | -4.151565000 | 1.560953000  | -2.136099000 |
| H | -3.943606000 | 1.726832000  | -3.190201000 |
| C | -4.054841000 | -0.518072000 | -0.548265000 |
| H | -3.791322000 | -1.564939000 | -0.676512000 |
| C | -4.025794000 | 0.198151000  | -1.770491000 |
| H | -3.745025000 | -0.431014000 | -2.611428000 |
| C | -4.554796000 | 2.406496000  | 1.153443000  |
| H | -4.582376000 | 3.065195000  | 2.017863000  |
| C | -4.525893000 | 3.122532000  | -0.068489000 |
| H | -4.536128000 | 4.199016000  | 0.083142000  |
| C | -4.358105000 | 2.772429000  | -1.431098000 |
| H | -4.271642000 | 3.644671000  | -2.074149000 |
| C | -4.428838000 | 1.043389000  | 1.519178000  |
| H | -4.383456000 | 0.907219000  | 2.596784000  |
| H | -0.362587000 | -0.544818000 | 0.103573000  |

### 3

|    |              |              |              |
|----|--------------|--------------|--------------|
| Sc | -2.739707122 | 1.385134896  | -0.136016023 |
| C  | -0.396594288 | 0.540180278  | 0.068684183  |
| Al | 0.318237021  | -1.419599480 | 0.043334424  |
| C  | -0.622703375 | 1.448010826  | 1.165393085  |
| H  | -0.633720395 | 1.167999405  | 2.213698772  |
| O  | 2.687252089  | 2.727758184  | 0.066074733  |
| C  | -0.847732475 | 2.771667989  | 0.689205667  |
| H  | -1.067898697 | 3.645136259  | 1.294087712  |
| N  | 2.316200236  | -0.915773694 | -0.034829381 |
| C  | -0.757378244 | 2.735382908  | -0.726092967 |
| H  | -0.899084899 | 3.575194335  | -1.398021690 |
| C  | -0.507834740 | -2.275401585 | -1.628170173 |
| H  | -1.281465903 | -1.544585843 | -1.923654409 |
| H  | 0.155883943  | -2.332188448 | -2.504175573 |
| C  | -4.334255458 | -0.145229728 | 0.854131684  |
| H  | -4.234467488 | -0.980263219 | 1.540564409  |

|   |              |              |              |
|---|--------------|--------------|--------------|
| C | -0.486336092 | 1.387863164  | -1.100318323 |
| H | -0.390637046 | 1.045622673  | -2.125787360 |
| C | 3.125329199  | -1.146841004 | 1.222965707  |
| C | -4.096219985 | 1.499371595  | -2.130762086 |
| H | -3.856288035 | 1.628406498  | -3.183374313 |
| C | -0.177532472 | -2.607871866 | 1.631251408  |
| H | 0.082015485  | -3.605100671 | 1.236071681  |
| H | 0.462958404  | -2.503333943 | 2.518064528  |
| C | -1.199168770 | -3.659043958 | -1.510377175 |
| H | -1.765171522 | -3.701013249 | -0.568175448 |
| C | 3.271423888  | -2.639878903 | 1.624876124  |
| H | 3.691623321  | -2.723482415 | 2.636322911  |
| H | 3.942008008  | -3.182001378 | 0.953689154  |
| H | 2.310590105  | -3.155023223 | 1.618752374  |
| C | 2.438286676  | -0.395863660 | 2.387497366  |
| H | 1.413187333  | -0.725462029 | 2.558755692  |
| H | 2.422944680  | 0.689011131  | 2.209042345  |
| H | 2.997097206  | -0.549233919 | 3.318987863  |
| C | -1.640233658 | -2.683660436 | 2.145851882  |
| H | -2.335109363 | -2.467755668 | 1.319862570  |
| C | 3.046414594  | -1.151635694 | -1.338238181 |
| C | -4.165188100 | -0.538784864 | -0.495116933 |
| H | -3.964059115 | -1.602251638 | -0.591869227 |
| C | -4.060866013 | 0.141546540  | -1.731922728 |
| H | -3.797500549 | -0.524108206 | -2.549648435 |
| C | 4.552642241  | -0.538925731 | 1.130822713  |
| H | 4.472980708  | 0.559045278  | 1.128471097  |
| H | 5.104714138  | -0.810767502 | 2.040907213  |
| C | 5.317283543  | -0.960022967 | -0.119304394 |
| H | 5.517130136  | -2.038951897 | -0.115813173 |
| H | 6.298473838  | -0.466904365 | -0.151972934 |
| C | 2.309806833  | -0.391748534 | -2.465070374 |
| H | 1.279291122  | -0.721315412 | -2.596109314 |
| H | 2.828638635  | -0.540656897 | -3.420267350 |

|   |              |              |              |
|---|--------------|--------------|--------------|
| H | 2.300644832  | 0.691522569  | -2.278454065 |
| C | -4.496391568 | 2.450126134  | 1.133120808  |
| H | -4.490442959 | 3.131281702  | 1.980650032  |
| C | -4.413165523 | 3.129404483  | -0.106228560 |
| H | -4.357413244 | 4.208323857  | 0.017794163  |
| C | -4.246547668 | 2.735885489  | -1.456659810 |
| H | -4.096341172 | 3.586294590  | -2.117418120 |
| C | -0.184493809 | -4.814302563 | -1.487530693 |
| H | 0.540773840  | -4.708732331 | -0.672867727 |
| H | 0.378799794  | -4.851568659 | -2.430916851 |
| H | -0.685039851 | -5.784043383 | -1.363896107 |
| C | -4.463187351 | 1.091165509  | 1.531419056  |
| H | -4.439837331 | 0.975514625  | 2.612092213  |
| C | 3.129002467  | -2.644973711 | -1.747618290 |
| H | 3.781822308  | -3.219797075 | -1.086148633 |
| H | 3.528684820  | -2.743988616 | -2.766040379 |
| H | 2.142388354  | -3.110958052 | -1.727686294 |
| C | -2.208976939 | -3.892360831 | -2.651139356 |
| H | -2.706177251 | -4.868979067 | -2.563656313 |
| H | -1.704857434 | -3.859042334 | -3.627424029 |
| H | -2.989126214 | -3.120124825 | -2.657527266 |
| C | -1.900966464 | -1.647370068 | 3.250854651  |
| H | -1.241248760 | -1.831532942 | 4.110694136  |
| H | -2.936243441 | -1.695329471 | 3.615306590  |
| H | -1.718829195 | -0.626632690 | 2.899914106  |
| C | 4.484611865  | -0.561938454 | -1.332463662 |
| H | 4.982816306  | -0.855986370 | -2.266283475 |
| H | 4.415953048  | 0.536961923  | -1.349022417 |
| C | 3.011852731  | 3.518150071  | -1.108541245 |
| H | 2.078256696  | 3.745329462  | -1.637502653 |
| H | 3.653008368  | 2.911396421  | -1.754247060 |
| C | 2.815452813  | 3.537792236  | 1.267025920  |
| H | 3.693427445  | 3.184502720  | 1.821902583  |
| H | 1.918858402  | 3.384767611  | 1.873509144  |

|    |              |              |              |
|----|--------------|--------------|--------------|
| C  | -1.988654346 | -4.089495962 | 2.671149648  |
| H  | -1.322042966 | -4.366934010 | 3.499857350  |
| H  | -1.871798044 | -4.846345394 | 1.885669156  |
| H  | -3.023274911 | -4.143819886 | 3.039487997  |
| C  | 2.988370099  | 4.976644856  | 0.778093723  |
| H  | 2.011266577  | 5.453661093  | 0.638618513  |
| H  | 3.567947586  | 5.584248068  | 1.479910938  |
| C  | 3.689300979  | 4.780776268  | -0.576292122 |
| H  | 4.763077988  | 4.610165433  | -0.433609401 |
| H  | 3.566441368  | 5.632293605  | -1.252634130 |
| Li | 1.759205795  | 1.021713212  | 0.005578754  |

#### 4

|    |              |              |              |
|----|--------------|--------------|--------------|
| Sc | 0.037800000  | 0.660099000  | -0.090230000 |
| C  | -2.399887000 | 0.052736000  | 0.004236000  |
| Al | -4.123110000 | 1.217130000  | 0.100849000  |
| C  | -1.712295000 | -0.705492000 | 1.020402000  |
| H  | -1.871448000 | -0.604571000 | 2.089324000  |
| O  | -3.639281000 | -3.524961000 | -0.370471000 |
| C  | -0.781725000 | -1.611214000 | 0.433787000  |
| H  | -0.115040000 | -2.281886000 | 0.962397000  |
| N  | -5.445827000 | -0.345044000 | -0.133035000 |
| C  | -0.863532000 | -1.452613000 | -0.972869000 |
| H  | -0.266225000 | -1.978534000 | -1.709780000 |
| C  | -3.960301000 | 2.556966000  | -1.446900000 |
| H  | -2.909105000 | 2.440041000  | -1.765233000 |
| H  | -4.542591000 | 2.306442000  | -2.346355000 |
| C  | 0.340487000  | 2.806669000  | 1.006629000  |
| H  | -0.264646000 | 3.371391000  | 1.709418000  |
| C  | -1.838747000 | -0.446715000 | -1.231013000 |
| H  | -2.102693000 | -0.091139000 | -2.221809000 |
| C  | -6.233910000 | -0.756690000 | 1.091905000  |
| C  | 1.218104000  | 1.483784000  | -2.008694000 |
| H  | 1.125236000  | 1.277778000  | -3.073420000 |

|   |              |              |              |
|---|--------------|--------------|--------------|
| C | -4.421138000 | 2.310506000  | 1.803848000  |
| H | -5.211661000 | 3.007357000  | 1.476141000  |
| H | -4.882601000 | 1.764824000  | 2.638667000  |
| C | -4.198669000 | 4.065309000  | -1.175520000 |
| H | -3.762267000 | 4.331416000  | -0.201407000 |
| C | -7.228962000 | 0.320031000  | 1.605347000  |
| H | -7.608397000 | 0.045783000  | 2.599016000  |
| H | -8.096671000 | 0.423619000  | 0.949150000  |
| H | -6.757312000 | 1.299609000  | 1.686614000  |
| C | -5.234407000 | -1.075446000 | 2.228226000  |
| H | -4.595066000 | -0.229181000 | 2.480971000  |
| H | -4.587668000 | -1.924497000 | 1.964989000  |
| H | -5.774872000 | -1.367111000 | 3.137188000  |
| C | -3.277697000 | 3.165033000  | 2.411491000  |
| H | -2.602728000 | 3.501205000  | 1.609124000  |
| C | -6.180175000 | -0.450250000 | -1.451231000 |
| C | -0.003126000 | 3.079614000  | -0.338992000 |
| H | -0.812136000 | 3.800621000  | -0.422165000 |
| C | 0.364902000  | 2.533372000  | -1.592492000 |
| H | -0.227595000 | 2.937346000  | -2.409896000 |
| C | -7.032312000 | -2.071169000 | 0.869741000  |
| H | -6.323073000 | -2.908075000 | 0.780613000  |
| H | -7.635788000 | -2.266066000 | 1.766849000  |
| C | -7.902705000 | -2.053863000 | -0.382093000 |
| H | -8.699022000 | -1.303274000 | -0.300210000 |
| H | -8.406401000 | -3.021678000 | -0.510831000 |
| C | -5.143074000 | -0.519145000 | -2.595525000 |
| H | -4.501572000 | 0.360590000  | -2.641343000 |
| H | -5.655683000 | -0.605294000 | -3.561771000 |
| H | -4.499867000 | -1.405416000 | -2.501567000 |
| C | 2.042258000  | 0.816762000  | 1.226906000  |
| H | 2.421949000  | 0.278505000  | 2.091787000  |
| C | 2.425922000  | 0.201987000  | -0.006627000 |
| C | 2.054556000  | 0.535426000  | -1.350361000 |

|   |              |              |              |
|---|--------------|--------------|--------------|
| H | 2.419147000  | -0.190353000 | -2.073303000 |
| C | -5.695342000 | 4.413584000  | -1.116985000 |
| H | -6.224082000 | 3.826385000  | -0.357910000 |
| H | -6.175709000 | 4.213577000  | -2.085400000 |
| H | -5.850803000 | 5.475727000  | -0.884479000 |
| C | 1.184115000  | 1.871998000  | 1.653339000  |
| H | 1.075029000  | 1.901645000  | 2.735716000  |
| C | -7.124150000 | 0.746287000  | -1.737647000 |
| H | -7.985331000 | 0.763969000  | -1.065310000 |
| H | -7.512808000 | 0.693810000  | -2.763809000 |
| H | -6.596629000 | 1.695316000  | -1.626826000 |
| C | -3.512096000 | 4.952761000  | -2.232549000 |
| H | -3.672425000 | 6.022593000  | -2.035480000 |
| H | -3.904745000 | 4.734187000  | -3.235720000 |
| H | -2.428633000 | 4.776248000  | -2.258773000 |
| C | -2.439455000 | 2.351747000  | 3.410637000  |
| H | -3.067036000 | 2.007031000  | 4.244629000  |
| H | -1.624843000 | 2.951392000  | 3.839969000  |
| H | -1.992281000 | 1.470490000  | 2.940193000  |
| C | -6.999114000 | -1.765702000 | -1.575419000 |
| H | -7.578353000 | -1.725723000 | -2.507942000 |
| H | -6.298818000 | -2.608823000 | -1.679724000 |
| C | -3.418234000 | -4.224540000 | -1.625061000 |
| H | -2.529439000 | -3.796396000 | -2.103847000 |
| H | -4.290008000 | -4.051940000 | -2.262791000 |
| C | -3.273201000 | -4.378476000 | 0.749647000  |
| H | -4.195713000 | -4.677011000 | 1.263086000  |
| H | -2.653214000 | -3.791091000 | 1.431925000  |
| C | -3.816286000 | 4.431225000  | 3.104723000  |
| H | -4.506156000 | 4.161521000  | 3.916678000  |
| H | -4.368233000 | 5.064911000  | 2.399445000  |
| H | -3.007001000 | 5.036187000  | 3.539088000  |
| C | -2.545736000 | -5.575299000 | 0.136162000  |
| H | -1.476427000 | -5.360390000 | 0.029868000  |



|    |              |              |              |
|----|--------------|--------------|--------------|
| H  | -2.653541000 | -6.479194000 | 0.743590000  |
| C  | -3.211391000 | -5.690520000 | -1.244973000 |
| H  | -4.175294000 | -6.207739000 | -1.167161000 |
| H  | -2.595936000 | -6.223553000 | -1.976068000 |
| Li | -3.861442000 | -1.599603000 | -0.225824000 |
| N  | 5.510015000  | -0.165784000 | -0.046598000 |
| Al | 3.834338000  | -1.356896000 | 0.140674000  |
| C  | 3.403592000  | -2.674764000 | -1.377534000 |
| C  | 3.764291000  | -2.463403000 | 1.864600000  |
| O  | 4.275675000  | 3.322621000  | -0.383548000 |
| C  | 4.142060000  | 4.006143000  | -1.662744000 |
| C  | 4.013291000  | 4.248530000  | 0.709302000  |
| Li | 4.245071000  | 1.408291000  | -0.190252000 |
| C  | 6.343859000  | 0.056212000  | 1.200112000  |
| C  | 6.286401000  | -0.234112000 | -1.346580000 |
| H  | 2.360237000  | -2.411361000 | -1.629712000 |
| H  | 3.954616000  | -2.505921000 | -2.315580000 |
| C  | 3.424588000  | -4.204376000 | -1.119861000 |
| C  | 7.027871000  | -1.226423000 | 1.744326000  |
| C  | 5.434113000  | 0.614875000  | 2.317111000  |
| C  | 7.439303000  | 1.139951000  | 0.999864000  |
| H  | 4.499315000  | -3.250541000 | 1.621495000  |
| H  | 4.180546000  | -1.989034000 | 2.764821000  |
| C  | 2.456290000  | -3.186211000 | 2.296577000  |
| H  | 2.936810000  | -4.409666000 | -0.157253000 |
| C  | 4.847971000  | -4.778882000 | -1.039047000 |
| C  | 2.627325000  | -4.969113000 | -2.195502000 |
| H  | 7.483619000  | -1.029014000 | 2.724072000  |
| H  | 7.823274000  | -1.582966000 | 1.085568000  |
| H  | 6.310295000  | -2.038760000 | 1.868994000  |
| H  | 4.629931000  | -0.068103000 | 2.588622000  |
| H  | 4.984488000  | 1.575446000  | 2.029573000  |
| H  | 6.025558000  | 0.805101000  | 3.221271000  |
| H  | 1.821785000  | -3.360544000 | 1.412901000  |

|   |             |              |              |
|---|-------------|--------------|--------------|
| C | 1.633846000 | -2.353585000 | 3.294115000  |
| C | 2.749192000 | -4.567296000 | 2.914871000  |
| C | 5.333717000 | 0.068372000  | -2.524805000 |
| C | 6.931865000 | -1.616548000 | -1.617976000 |
| C | 7.390441000 | 0.855185000  | -1.442066000 |
| H | 6.952163000 | 2.122116000  | 0.898252000  |
| H | 8.048784000 | 1.187298000  | 1.912468000  |
| C | 8.310468000 | 0.915217000  | -0.229507000 |
| H | 8.898714000 | -0.006511000 | -0.134447000 |
| H | 9.035693000 | 1.732932000  | -0.339753000 |
| H | 4.535197000 | -0.665912000 | -2.623472000 |
| H | 5.896828000 | 0.069334000  | -3.466438000 |
| H | 4.873824000 | 1.061783000  | -2.432839000 |
| H | 5.440812000 | -4.296879000 | -0.253625000 |
| H | 5.379259000 | -4.639776000 | -1.991035000 |
| H | 4.829872000 | -5.856564000 | -0.827360000 |
| H | 7.740289000 | -1.844434000 | -0.919233000 |
| H | 7.357274000 | -1.650322000 | -2.630270000 |
| H | 6.189841000 | -2.412318000 | -1.539507000 |
| H | 2.619180000 | -6.052233000 | -2.005518000 |
| H | 3.064175000 | -4.807548000 | -3.191171000 |
| H | 1.584777000 | -4.626345000 | -2.234662000 |
| H | 2.215752000 | -2.164884000 | 4.207223000  |
| H | 0.716143000 | -2.879042000 | 3.593161000  |
| H | 1.341817000 | -1.384570000 | 2.878319000  |
| H | 7.963059000 | 0.685121000  | -2.363863000 |
| H | 6.907965000 | 1.839064000  | -1.551948000 |
| H | 3.226056000 | 3.645987000  | -2.143845000 |
| H | 5.006886000 | 3.737819000  | -2.277083000 |
| C | 4.065743000 | 5.495529000  | -1.325029000 |
| H | 4.969850000 | 4.478149000  | 1.196252000  |
| H | 3.350256000 | 3.748691000  | 1.419670000  |
| C | 3.391405000 | 5.482235000  | 0.056677000  |
| H | 3.385270000 | -4.461533000 | 3.804722000  |

|   |             |              |              |
|---|-------------|--------------|--------------|
| H | 3.278166000 | -5.216916000 | 2.206737000  |
| H | 1.826955000 | -5.082428000 | 3.221136000  |
| H | 2.308838000 | 5.349151000  | -0.044455000 |
| H | 3.576556000 | 6.392963000  | 0.634994000  |
| H | 5.071088000 | 5.929332000  | -1.260137000 |
| H | 3.499437000 | 6.057392000  | -2.074181000 |

## 6.2 Hessian Calculations (B3LYP/6-31+G\*)

Table S7. Harmonic frequencies ( $\text{cm}^{-1}$ ), Reduced masses (amu), force constants ( $\text{mDyne \AA}^{-1}$ ) and IR intensities ( $\text{km mol}^{-1}$ ) for the nine lowest vibrational frequency modes.

| Vibrational Mode                    | Frequencies | Reduced Masses | Force Constants | IR Intensities |
|-------------------------------------|-------------|----------------|-----------------|----------------|
| <i>Sc sandwich 1</i>                |             |                |                 |                |
| 1                                   | 5.3798      | 3.5410         | 0.0001          | 0.0000         |
| 2                                   | 87.4667     | 4.9302         | 0.0222          | 1.0750         |
| 3                                   | 88.2041     | 4.9395         | 0.0226          | 1.0705         |
| 4                                   | 203.8507    | 5.5777         | 0.1366          | 0.0674         |
| 5                                   | 237.8808    | 3.8912         | 0.1297          | 0.0652         |
| 6                                   | 238.2104    | 3.8949         | 0.1302          | 0.0663         |
| 7                                   | 241.9608    | 3.5286         | 0.1217          | 0.0003         |
| 8                                   | 242.1249    | 3.5277         | 0.1218          | 0.0003         |
| 9                                   | 331.5292    | 9.5469         | 0.6182          | 0.4284         |
| <i>Monometallated Sc sandwich 3</i> |             |                |                 |                |
| 1                                   | 17.0637     | 4.1577         | 0.0007          | 0.1028         |
| 2                                   | 22.0522     | 4.0784         | 0.0012          | 0.0234         |
| 3                                   | 22.4098     | 3.3631         | 0.0010          | 0.5087         |
| 4                                   | 29.8381     | 4.4146         | 0.0023          | 0.0069         |
| 5                                   | 33.3102     | 3.0559         | 0.0020          | 0.0482         |
| 6                                   | 35.3185     | 3.2328         | 0.0024          | 0.0396         |
| 7                                   | 47.8124     | 3.2273         | 0.0043          | 0.0405         |
| 8                                   | 50.1695     | 3.4172         | 0.0051          | 0.1573         |
| 9                                   | 60.6200     | 3.3725         | 0.0073          | 0.1715         |
| <i>Dimetallated Sc sandwich 4</i>   |             |                |                 |                |
| 1                                   | 5.3798      | 3.5410         | 0.0001          | 0.0000         |

|   |          |        |        |        |
|---|----------|--------|--------|--------|
| 2 | 87.4667  | 4.9302 | 0.0222 | 1.0750 |
| 3 | 88.2041  | 4.9395 | 0.0226 | 1.0705 |
| 4 | 203.8507 | 5.5777 | 0.1366 | 0.0674 |
| 5 | 237.8808 | 3.8912 | 0.1297 | 0.0652 |
| 6 | 238.2104 | 3.8949 | 0.1302 | 0.0663 |
| 7 | 241.9608 | 3.5286 | 0.1217 | 0.0003 |
| 8 | 242.1249 | 3.5277 | 0.1218 | 0.0003 |
| 9 | 331.5292 | 9.5469 | 0.6182 | 0.4284 |

### 6.3 Thermochemical Analysis

| Table S8. Thermochemical analysis of <b>1</b> , <b>3</b> , and <b>4</b> . All values are in hartree. Except for E(Single-point - RB3LYP/6-311++G**), all other entries are related to B3LYP/6-31+G* calculations. |              |              |              |
|-------------------------------------------------------------------------------------------------------------------------------------------------------------------------------------------------------------------|--------------|--------------|--------------|
|                                                                                                                                                                                                                   | <b>1</b>     | <b>3</b>     | <b>4</b>     |
| E(RB3LYP/6-31+G*)                                                                                                                                                                                                 | -1263.959644 | -2470.152084 | -3676.343960 |
| Zero-point correction                                                                                                                                                                                             | 0.219859     | 0.834688     | 1.449627     |
| Thermal correction to Energy                                                                                                                                                                                      | 0.232017     | 0.880673     | 1.529449     |
| Thermal correction to Enthalpy                                                                                                                                                                                    | 0.232961     | 0.881618     | 1.530393     |
| Thermal correction to Gibbs Free Energy                                                                                                                                                                           | 0.179959     | 0.755230     | 1.329887     |
| Sum of electronic and zero-point Energies                                                                                                                                                                         | -1263.739785 | -2469.317396 | -3674.894333 |
| Sum of electronic and thermal Energies                                                                                                                                                                            | -1263.727628 | -2469.271411 | -3674.814511 |
| Sum of electronic and thermal Enthalpies                                                                                                                                                                          | -1263.726684 | -2469.270467 | -3674.813567 |
| Sum of electronic and thermal Free Energies                                                                                                                                                                       | -1263.779686 | -2469.396855 | -3675.014074 |
| E(Single-point - RB3LYP/6-311++G**)                                                                                                                                                                               | -1264.110499 | -2470.563748 | -3677.015576 |

## 6.4 Frontier Molecular Orbitals

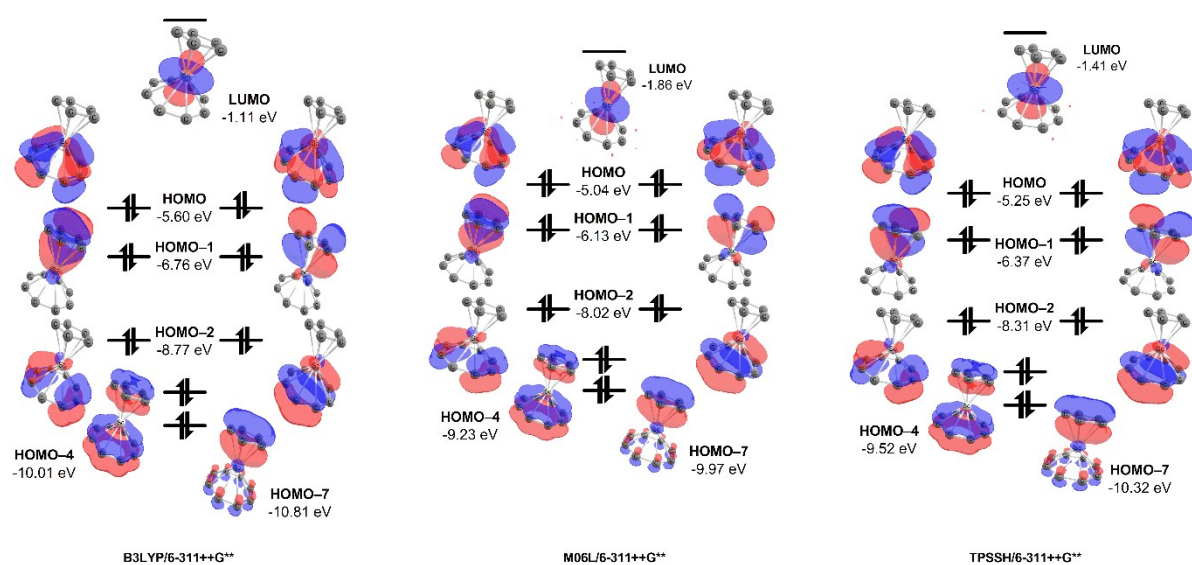

**Figure S25.** Selected Molecular Orbitals of **1**. Hydrogen atoms are omitted for clarity. Surface isovalue:  $\pm 0.04 [e a_0^{-3}]^{1/2}$ . From top to bottom (energies in eV): LUMO (-1.11); HOMO (-5.60); HOMO-1 (-5.60); HOMO-2 (-6.76); HOMO-3 (-6.76); HOMO-4 (-8.77); HOMO-5 (-8.77); HOMO-8 (-10.01); HOMO-13 (-10.81).

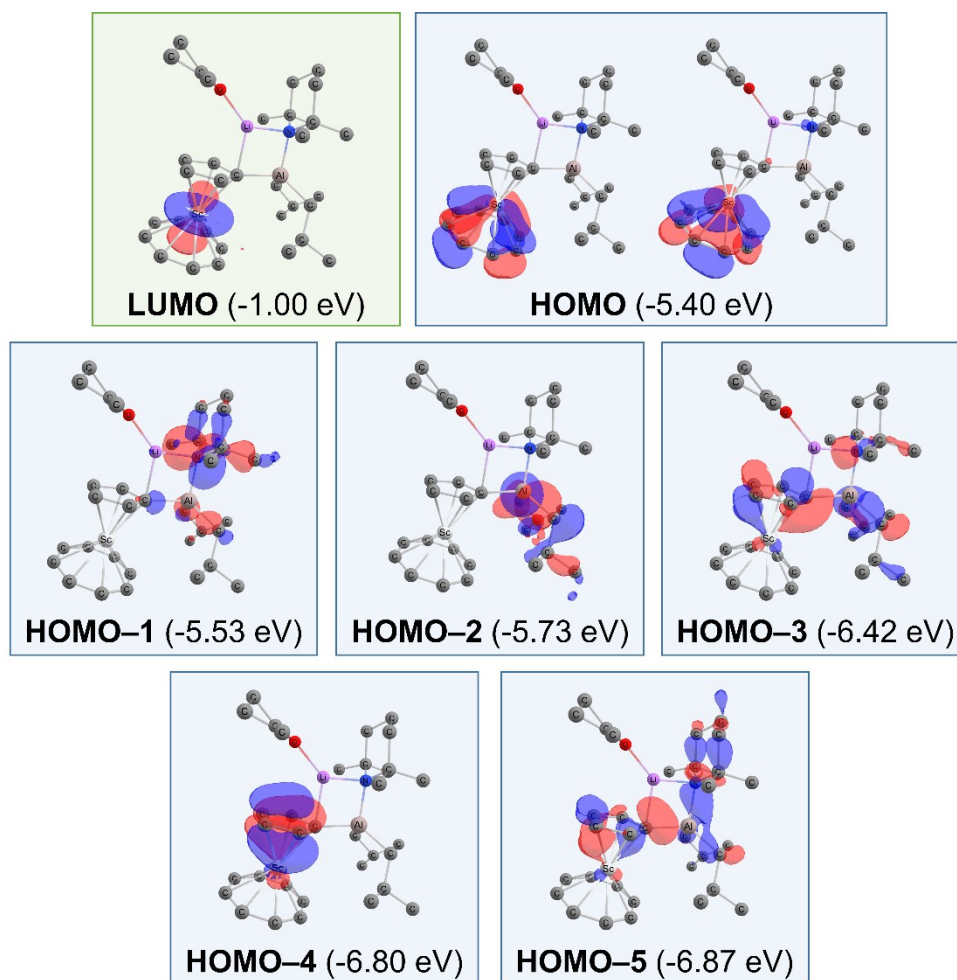

**Figure S26.** Selected Molecular Orbitals of **3** at the B3LYP/6-311++G\*\* level. Orbital energies are in eV. Hydrogen atoms are omitted for clarity.

Surface isovalue:  $\pm 0.04 [e a_0^3]^{1/2}$ .

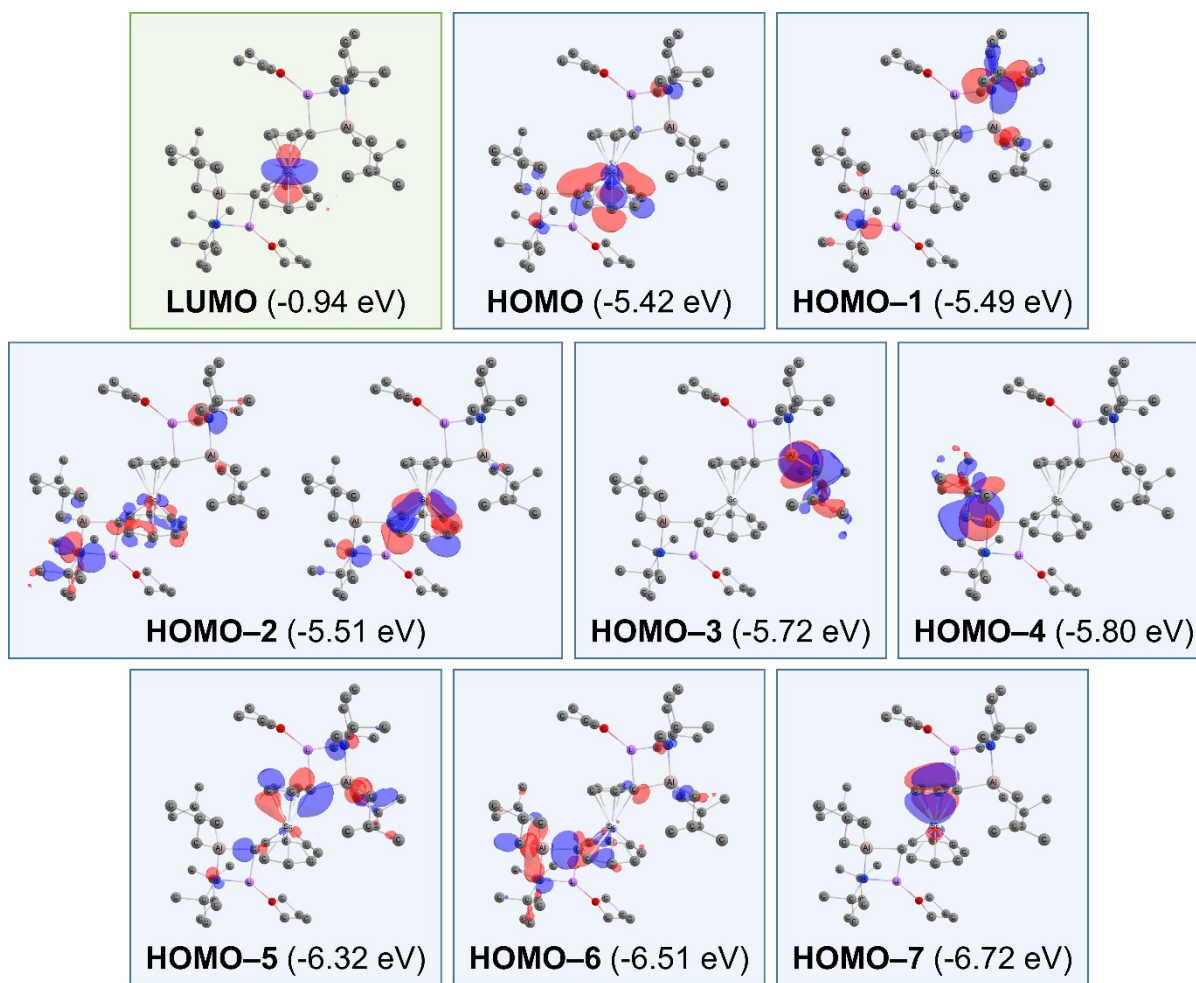

**Figure S27.** Selected Molecular Orbitals of **4** at the B3LYP/6-311++G\*\* level. Orbital energies are in eV. Hydrogen atoms are omitted for clarity. Surface isovalue:  $\pm 0.04 [e a_0^{-3}]^{1/2}$ .

## 7 References

- 1 M. F. Lappert, M. J. Slade, A. Singh, J. L. Atwood, R. D. Rogers and R. Shakir, *J. Am. Chem. Soc.*, 1983, **105**, 302-304; E. Hevia, A. R. Kennedy, R. E. Mulvey, D. L. Ramsay and S. D. Robertson, *Chem. Eur. J.*, 2013, **19**, 14069-14075.
- 2 R. E. Mulvey, D. R. Armstrong, B. Conway, E. Crosbie, A. R. Kennedy and S. D. Robertson, *Inorg. Chem.*, 2011, **50**, 12241-12251.
- 3 A. Macchioni, G. Ciancaleoni, C. Zuccaccia and D. Zuccaccia, *Chem. Soc. Rev.*, 2008, **37**, 479-489; D. Li, I. Keresztes, R. Hopson and P. G. Williard, *Acc. Chem. Res.*, 2009, **42**, 270-280.
- 4 R. Neufeld and D. Stalke, *Chem. Sci.*, 2015, **6**, 3354-3364.
- 5 G. Sheldrick, *Acta Cryst.*, 2015, **C71**, 3-8.
- 6 A. Spek, *Acta Cryst.*, 2015, **C71**, 9-18.
- 7 M. J. Frisch, G. W. Trucks, H. B. Schlegel, G. E. Scuseria, M. A. Robb, J. R. Cheeseman, G. Scalmani, V. Barone, G. A. Petersson, H. Nakatsuji, X. Li, M. Caricato, A. V. Marenich, J. Bloino, B. G. Janesko, R. Gomperts, B. Mennucci, H. P. Hratchian, J. V. Ortiz, A. F. Izmaylov, J. L. Sonnenberg, D. Williams-Young, F. Ding, F. Lipparini, F. Egidi, J. Goings, B. Peng, A. Petrone, T. Henderson, D. Ranasinghe, V. G. Zakrzewski, J. Gao, N. Rega, G. Zheng, W. Liang, M. Hada, M. Ehara, K. Toyota, R. Fukuda, J. Hasegawa, M. Ishida, T. Nakajima, Y. Honda, O. Kitao, H. Nakai, T. Vreven, K. Throssell, J. A. Montgomery, Jr., J. E. Peralta, F. Ogliaro, M. J. Bearpark, J. J. Heyd, E. N. Brothers, K. N. Kudin, V. N. Staroverov, T. A. Keith, R. Kobayashi, J. Normand, K. Raghavachari, A. P. Rendell, J. C. Burant, S. S. Iyengar, J. Tomasi, M. Cossi, J. M. Millam, M. Klene, C. Adamo, R. Cammi, J. W. Ochterski, R. L. Martin, K. Morokuma, O. Farkas, J. B. Foresman and D. J. Fox, Gaussian 16, Revision B.01, Gaussian, Inc., Wallingford CT, 2016.
